# Supplementary material for: Recent trends in seroprevalence of rubella in Korean women of childbearing age: a cross-sectional study
Source: PubMed Central journal article supplement — BMJ Open. 2020 Jan 2;10(1):e030873. doi: 10.1136/bmjopen-2019-030873 (PMC6955562; doi:10.1136/bmjopen-2019-030873), 2020-01-02
Supplement: bmjopen-2019-030873.draft_revisions.pdf [file bmjopen-2019-030873.draft_revisions.pdf]

# BMJ Open

BMJ Open is committed to open peer review. As part of this commitment we make the peer review history of every article we publish publicly available.

When an article is published we post the peer reviewers' comments and the authors' responses online. We also post the versions of the paper that were used during peer review. These are the versions that the peer review comments apply to.

The versions of the paper that follow are the versions that were submitted during the peer review process. They are not the versions of record or the final published versions. They should not be cited or distributed as the published version of this manuscript.

BMJ Open is an open access journal and the full, final, typeset and author-corrected version of record of the manuscript is available on our site with no access controls, subscription charges or pay-per-view fees (<http://bmjopen.bmj.com>).

If you have any questions on BMJ Open's open peer review process please email [info.bmjopen@bmj.com](mailto:info.bmjopen@bmj.com)

# BMJ Open

## Recent trends in seroprevalence of rubella in Korean women of childbearing age

|                               |                                                                                                                                                                                                                                                                                                                                                                                                                                                                                                                                                                                                             |
|-------------------------------|-------------------------------------------------------------------------------------------------------------------------------------------------------------------------------------------------------------------------------------------------------------------------------------------------------------------------------------------------------------------------------------------------------------------------------------------------------------------------------------------------------------------------------------------------------------------------------------------------------------|
| Journal:                      | <i>BMJ Open</i>                                                                                                                                                                                                                                                                                                                                                                                                                                                                                                                                                                                             |
| Manuscript ID                 | bmjopen-2019-030873                                                                                                                                                                                                                                                                                                                                                                                                                                                                                                                                                                                         |
| Article Type:                 | Research                                                                                                                                                                                                                                                                                                                                                                                                                                                                                                                                                                                                    |
| Date Submitted by the Author: | 04-Apr-2019                                                                                                                                                                                                                                                                                                                                                                                                                                                                                                                                                                                                 |
| Complete List of Authors:     | Choi, Rihwa; Green Cross Corp, Laboratory Medicine, Green Cross Laboratories; Sung Kyun Kwan University School of Medicine at Samsung Medical Center Cancer Center, Department of Laboratory Medicine and Genetics<br>Oh, Yejin; Green Cross Corp, Department of Laboratory Medicine, Green Cross Laboratories<br>Oh, Youngju; Green Cross Corp, Department of Laboratory Medicine, Green Cross Laboratories<br>Kim, Sung Ho; Green Cross Corp, Department of Laboratory Medicine, Green Cross Laboratories<br>Lee, Sang Gon; Green Cross Corp, Department of Laboratory Medicine, Green Cross Laboratories |
| Keywords:                     | rubella, seroprevalence, immunization, vaccination                                                                                                                                                                                                                                                                                                                                                                                                                                                                                                                                                          |
|                               |                                                                                                                                                                                                                                                                                                                                                                                                                                                                                                                                                                                                             |

SCHOLARONE™  
Manuscripts

1  
2  
3  
4 **1 Recent trends in seroprevalence of rubella in Korean women of childbearing age**  
5  
6

7 2  
8

9  
10 3 Running title: Rubella seroprevalence in Korean women  
11  
12

13 4  
14

15 **5 Rihwa Choi <sup>1,2</sup>, Yejin Oh <sup>1</sup>, Youngju Oh <sup>1</sup>, Sung Ho Kim <sup>1</sup>, and Sang Gon Lee <sup>1,\*</sup>**  
16  
17

18 6 <sup>1</sup> Department of Laboratory Medicine, Green Cross Laboratories, Yongin, Gyeonggi, Republic of Korea  
19  
20

21 7 <sup>2</sup> Department of Laboratory Medicine and Genetics, Samsung Medical Center, Sungkyunkwan University  
22  
23

24 8 School of Medicine, Seoul, Republic of Korea  
25  
26

27 9  
28

29 10 \*Corresponding author: Sang Gon Lee, M.D.  
30

31 11 Department of Laboratory Medicine, Green Cross Laboratories, 107, Ihyeonro 30 beon-gil, Giheng-gu, Yongin-  
32

33 12 Si, Gyeonggi-do, Republic of Korea  
34  
35

36 13 Tel; +82-31-260-9209, fax; +82-31-260-0964, e-mail; sglee@gclabs.co.kr  
37  
38  
39  
40  
41  
42  
43  
44  
45  
46  
47  
48  
49  
50  
51  
52  
53  
54  
55  
56  
57  
58  
59  
60

1  
2  
3  
4 14 **Abstract**

5  
6  
7 15 **Objectives:** The aim of this study was to investigate the epidemiology of rubella using the serologic status of  
8  
9 16 rubella-specific IgG antibodies (anti-rubella IgG) in Korean women of childbearing age (15-49 years).

10  
11  
12 17 **Design:** Retrospective cross-sectional study.

13  
14  
15 18 **Setting:** Population-based cross-sectional study in South Korea.

16  
17 19 **Participants:** Between January 2010 and December 2017, test results from Korean women age 15-49 years who  
18  
19 20 had visited an obstetric private clinic (nationwide institutions) and had requested rubella-specific IgG antibody  
20  
21 21 tests from Green Cross Laboratories were obtained from the laboratory information system.

22  
23 22 **Results:** Between 2010 and 2017, 329,707 tests from 327,637 Korean women age 15-49 years who had visited  
24  
25 23 obstetric private clinics (1,438 institutions nationwide) were retrospectively analyzed by year and age group.

26  
27 24 **Results:** The overall rate of women that were anti-rubella IgG- and defined as 'unimmunized' was 7.8-9.7%.

28  
29 25 Over the 8-year study period, the rate of unimmunized women ranged from 7.8-9.7%. Over the study period, the  
30  
31 26 rate of women who were IgG+ (from 81.0% in 2010 to 73.0% in 2017) decreased and the rate of women who  
32  
33 27 had 'equivocal' results from 2010 to 2017 (10.3% in 2010 to 17.6% in 2017) increased. Among the age groups,  
34  
35 28 women in their 40s were the most unprotected from rubella infection (11.8%).

36  
37  
38 29 **Conclusions:** In consideration of the immunization status by age group and the decrease in prevalence of  
39  
40 30 unimmunized women, future public health efforts should be focused on catch-up activities. The results of this  
41  
42 31 study could be used to strengthen disease control and prevent rubella, including a nationwide immunization  
43  
44 32 program.

### 33 **Strengths and limitations of this study**

34 ► The main strength of the study, lies in its sample size, due to the fact that it is a nationwide study with one of  
35 the broadest samples to date in South Korea.

36 ► The study provided a recent information of the seroprevalence of anti-rubella IgG that have not been  
37 available at this scale before.

38 ► The huge sample size of this study allowed for precise information of the age related seroprevalence of anti-  
39 rubella IgG and this study provides valuable information for establishing a catch-up vaccination program in South  
40 Korea.

41 ► One limitation of this study was the lack of detailed clinical information, however, seroprevalence studies are  
42 an essential tool to monitor the efficacy of vaccination programmes, to understand population immunity and to  
43 identify populations at higher risk of infection.

### 45 **Funding**

46 This work was supported by Abbott Diagnostics Korea. The sponsor had no involvement in the study design, data  
47 interpretation, or writing of the manuscript. The authors have no other relevant financial interest in the products  
48 or companies described in this article.

### 50 **Competing interests**

51 None declared.

## 52 Introduction

53 Rubella disease, so-called German measles, is caused by rubella virus (belonging to the family *Togaviridae* and  
54 the only member of the genus *Rubivirus*).<sup>1</sup> Although most cases of infection lead to a mild, self-limiting  
55 measles-like disease, the real threat arises when rubella virus infects the fetus, particularly during the first  
56 trimester when infection can lead to miscarriage or congenital rubella syndrome.<sup>1</sup> Worldwide, over 100,000  
57 babies are born with congenital rubella syndrome every year, and the World Health Organization (WHO)  
58 recommends that all countries that have not yet introduced a rubella vaccine should consider doing so using  
59 existing, well-established measles immunization programs.<sup>2</sup> The WHO Strategic Advisory Group of Experts on  
60 Immunization (SAGE) recommends an increased focus on improving national immunization systems in general  
61 to better control rubella.<sup>2</sup> Under the Global Vaccine Action Plan 2011–2020, rubella is targeted for elimination  
62 in five WHO Regions by 2020.<sup>3,4</sup> As has been reported in Europe, suboptimal coverage levels in childhood  
63 (<95%) can lead to a prolonged inter-epidemic period and to a paradoxical shift of disease incidence towards  
64 older age groups, including women of childbearing age, with a consequent increase of congenital rubella  
65 syndrome.<sup>5</sup> Serosurveys may represent an effective instrument to measure infection- and vaccine-induced  
66 immunity in a specific population, and serosurveys can effectively support strategies aimed at eliminating the  
67 disease.<sup>5</sup>

68 In Korea, a rubella vaccination program used in combination with mumps and measles vaccines  
69 (MMR) has been included in the national immunization program since 1985 for disease control and prevention.<sup>6</sup>  
70 A second MMR vaccine dose was introduced in 1997, and a catch-up measles-rubella vaccine for school-aged  
71 children was introduced in 2001.<sup>6</sup> In 2002, a two-dose MMR keep-up program through the verification of  
72 vaccination history was introduced at elementary schools (6-7 years).<sup>6</sup> A new vaccination policy was formed by  
73 the 2012 Military Healthcare Service, and since then, MMR vaccines have been routinely administered to all  
74 new recruits early in basic training.<sup>7</sup>

75 Although there have been several studies on rubella in Korea, most of the studies have only been  
76 focused on surveillance of newly identified cases, seroprevalences of rubella IgG in children, or had been  
77 conducted in the early 1990s.<sup>6-12</sup> Although a recent meta-analysis assessing global seroprevalence of rubella  
78 among pregnant and childbearing age women, no data from Korean populations were included in the study.<sup>5</sup> In a  
79 recent 16-year review of seroprevalence studies on rubella, only one Korean study on children and adolescents  
80

1  
2  
3  
4 80 was included.<sup>3</sup> To our knowledge, no recent data have been collected on rubella immunization status with  
5  
6 81 rubella-specific IgG antibodies in Korean women of childbearing age in a large study population, which could  
7  
8 82 provide basic knowledge on nationwide immunization strategies.  
9

10  
11 83 Therefore, in this study, we aimed to investigate the epidemiology of rubella and to share baseline  
12  
13 84 data for future immunization policies. The aim of this study was to investigate the epidemiology of rubella  
14  
15 85 immunization status using serologic assays for rubella-specific IgG antibodies in Korean women of childbearing  
16  
17 86 age. In addition, we assessed rubella immunization status according to year and age group.  
18

19 87

## 22 88 **Materials and Methods**

23  
24  
25 89

### 27 90 Participants' involvement and data collection

28  
29  
30 91 No patients were involved in the development of the research question or the outcome measures, nor were they  
31  
32 92 involved in developing plans for design or implementation of the study. No patients were asked for advice  
33  
34 93 regarding the interpretation or writing of results. There are no plans to disseminate the study results to the  
35  
36 94 relevant patient community.  
37

38  
39 95

### 41 96 Study populations

42  
43  
44 97 Between January 2010 and December 2017, test results from Korean women age 15-49 years who had visited an  
45  
46 98 obstetric private clinic (nationwide institutions) and had requested rubella-specific IgG antibody tests from  
47  
48 99 Green Cross Laboratories were obtained from the laboratory information system. Green Cross Laboratories are  
49  
50 100 one of the largest referral clinical laboratories in Korea. Test results from women whose age was unknown were  
51  
52 101 excluded. All data were anonymized before being transferred to analysis for age- and year-specific  
53  
54 102 seroprevalences. Missing age and sex data were excluded. The results of this study were prone to ascertainment  
55  
56 103 bias and the use of a population based study minimised selection bias.<sup>13</sup> This study was conducted according to  
57  
58 104 guidelines in the Declaration of Helsinki, and all procedures involving human subjects were approved by the  
59  
60 105 Institutional Review Board of Green Cross Laboratories (GCL 2017-1010-02).

106

## 107 Analytical procedures

108 All serum samples were tested for anti-rubella IgG using a chemiluminescent microparticle immunoassay  
109 (CMIA, Architect i2000SR, Abbott Diagnostics, Abbott Park, IL, USA) according to the manufacturer's  
110 instructions. For the rubella IgG assay, the presence of  $\geq 10$  IU/mL was defined as 'positive' and considered  
111 'immunized.' Antibody levels of 0.0-4.9 IU/mL were defined as 'negative,' and antibody levels between 5.0-9.9  
112 IU/mL were defined as 'equivocal.' Positive rubella-specific IgG results are indicative of past exposure to  
113 rubella virus.

114

## 115 Definition

116 Women who had 'negative' results were defined as unimmunized. Birth cohorts were defined based on the  
117 vaccination program: pre-catch-up, 1976-1984; catch-up, 1985-1993; and keep-up,  $\geq 1994$ .<sup>6</sup> The pre-catchup  
118 (1976-1984) cohort was women who had presumptively limited MMR vaccination coverage with only one dose  
119 provided by the public program. The catch-up (1985-1993) cohort was woman who had limited MMR  
120 vaccination coverage, but were given the measles-rubella (MR) vaccine during the 2001 catch-up campaign.<sup>6</sup>  
121 The keep-up ( $\geq 1994$ ) cohort was women who were candidates for the keep-up program.<sup>6</sup>

122

## 123 Statistical analysis

124 Categorical variables are presented as frequencies and percentages. The chi-squared test was used to compare  
125 categorical variables. We used nonparametric methods when data were not normally distributed. To assess  
126 rubella immunization status according to the year and age group, a Cochran-Armitage trend test was performed.  
127 Statistical analysis was executed using MedCalc Statistical Software version 18.5 (MedCalc Software bvba,  
128 Ostend, Belgium). *P*-values were considered significant at the 0.05 level.

129

130 **Results**



131

132 General characteristics of the study population

133 Between January 2010 and December 2017, 329,701 tests from 327,637 Korean women age 15-49 years who  
134 had visited obstetric private clinics (from 1,438 institutions nationwide) and had requested rubella-specific IgG  
135 antibody tests from Green Cross Laboratories were obtained from the laboratory information system and  
136 included in the study. The numbers of the study subjects by each year and age group are summarized in Table 1.

137

138 Rubella immunization status for Korean women of childbearing age

139 The overall rate of IgG- women who were defined as 'unimmunized' was 8.7%, and the overall rate of IgG+  
140 women was 76.4%. Rubella-specific IgG antibody test results by year are summarized in Table 2 and Figure 1.  
141 There was a decrease in the rate of women who had positive rubella-specific IgG antibody results (from 81.0%  
142 in 2010 to 73.0% in 2017), and an increase in the rate of women who had 'equivocal' results from 2010 to 2017  
143 (10.3% in 2010 to 17.6% in 2017,  $p < 0.05$ , Figure 1). The rate of positive rubella-specific IgG antibody results  
144 by age were 76.7%, 77.9%, 75.3%, and 79.0% for women in their 10s, 20s, 30s, and 40s, respectively. The rate  
145 of negative results by age were 6.9%, 7.1%, 9.7%, and 11.8% for women in their 10s, 20s, 30s and 40s,  
146 respectively. Among the age groups and birth cohorts, women in their 40s and the pre-catch-up cohort (IgG-,  
147 9.9%) were the most unprotected for rubella infection (IgG-, 11.8%, Supplementary Figure S1). Different  
148 numbers of anti-rubella IgG tests had been requested between geographic regions during the 8-year study period  
149 (Figure 2, Supplementary Tables S1 and S2). In this study, women living in Sejong city were the most protected  
150 from rubella infection (IgG+, 81.3%), while women living in South Jeolla Province were the most unprotected  
151 from rubella infection (IgG-, 10.6%, Supplementary Table S1). Less than 1,000 women had been tested for anti-  
152 rubella IgG in the Gangwon province and Ulsan.

153

## 154 Discussion

155 In this study, we investigated the seroprevalence of rubella in Korean women of childbearing age within the past  
156 8 years. The strength of this study was the large study population over a long study period (8 years) and the

1  
2  
3  
4 157 novelty of the study population (Korean women of childbearing age were assessed for the first time in Korea).  
5  
6

7 158 Understanding the spread of infectious diseases and designing optimal control strategies is a major  
8  
9 159 goal of public health.<sup>14 15</sup> In the present study, the seronegativity prevalence was 8.7% in Korean women of  
10  
11 160 childbearing age. A recent 16-year review of seroprevalence studies on rubella assessing 97 articles between  
12  
13 161 January 1998 and June 2014 had reported that seroprevalence ranged from 53.0% to 99.3% for rubella studies.<sup>3</sup>  
14  
15 162 A recent meta-analysis of rubella among pregnant and childbearing age women had reported that approximately  
16  
17 163 88% of the studies conducted on pregnant women had reported a seronegativity rate >5%, and the pooled  
18  
19 164 rubella seronegativity prevalence was 9.3%.<sup>5</sup> The study had reported that global seronegativity prevalence was  
20  
21 165 of concern, considering that WHO set the rubella susceptibility threshold at 5% for women of childbearing age.  
22  
23 166 Previous studies that had been included in the meta-analysis had used more than 1,000 subjects and had been  
24  
25 167 published within the past 10 years are summarized in Table 3.

26  
27 168 The seroprevalence of rubella in Korean populations was assessed previously in infants, children, and  
28  
29 169 adolescents.<sup>8-12</sup> One study on 5,393 students from 8 elementary schools in the Gyeonggi province, Korea in  
30  
31 170 1993, 1996, and 1996 had reported that the age-adjusted rubella susceptibility rate was 22.9%.<sup>10</sup> Another study  
32  
33 171 performed during the same study period had reported that rubella antibody loss rates were 14.3-15.8% in Korean  
34  
35 172 children.<sup>8</sup> In a 2005 population-based survey in Nonsan, Korea, age-appropriate immunization among urban-  
36  
37 173 rural children aged 24-35 months had reported that the age-appropriate MMR immunization rate was 61.1%-  
38  
39 174 97.4%.<sup>12</sup> A recent study conducted between September 2009 and December 2010 assessing seroprevalence of  
40  
41 175 rubella in 295 infants and 80 of their mothers had reported that seropositive rates were 22.4% in infants and  
42  
43 176 98.8% in mothers (79/80).<sup>9</sup> In that study, because none of the infants had a history of MMR vaccination, natural  
44  
45 177 infection, or contact with an infected person, it was assumed that specific antibodies were passed from their  
46  
47 178 mothers to their infants.<sup>9</sup> Moreover, among the 80 mothers, 55 (68.8%) had experienced either immunization or  
48  
49 179 past rubella infection.<sup>9</sup>

50  
51 180 During the study period, the rate of unimmunized women ranged from 7.8-9.7%, and the overall  
52  
53 181 percentage of positive rubella IgG was 76.4% among Korean women of childbearing age. There was an increase  
54  
55 182 in the rate of equivocal results. This result suggests that 23.6% of women were still unprotected from rubella in  
56  
57 183 the elimination era. According to the Infectious Disease Surveillance Yearbook 2017 published by the Korean  
58  
59 184 Ministry of Health and Welfare and the Korean Centers for Disease Control and Prevention, the incidence rate  
60

1  
2  
3  
4 185 of rubella from 2001-2017 decreased (from 0.17 per 100,000 populations in 2001 to 0.01 per 100,000  
5  
6 186 populations in 2017). No rubella outbreak had been reported in South Korea over 8 years (2010-2017)  
7  
8 187 according to the Infectious Disease Surveillance Yearbook. Among the different age groups, older women were  
9  
10 188 more likely to have negative IgG results and no protection from rubella infection. Women in their 30s had the  
11  
12 189 lowest rate of IgG+ results in this study. According to recent data from Korean Statistical Information (KOSIS),  
13  
14 190 the average maternal age at delivery for Korean women was 32.4 years in 2016. Because of this, public health  
15  
16 191 efforts should be focused on catch-up activities. The results of this study could be used as basic knowledge to  
17  
18 192 support strengthening disease control and prevention of rubella, including a nationwide immunization program.  
19  
20 193 Susceptible woman of childbearing age is indeed a priority, and public health efforts should be focused on  
21  
22 194 catch-up activities in order to reduce the rate of susceptible young adults, especially for all women of  
23  
24 195 childbearing age.<sup>16</sup> Gynecologists and general practitioners should be encouraged to propose rubella screening  
25  
26 196 for women of childbearing age before they become pregnant to identify those women who lack rubella  
27  
28 197 antibodies, whether acquired as the result of vaccination or a natural infection.<sup>16</sup> Finally, active surveillance  
29  
30 198 from laboratories that perform rubella immunity testing should be planned; laboratories should notify the Public  
31  
32 199 Health Authority about every woman of childbearing age with a negative test, and the Public Health Authority  
33  
34 200 should engage these women to promote immunization against rubella.<sup>16</sup> Serological surveillance is an important  
35  
36 201 tool for the evaluation of vaccination programs and avoids the limitations of passive disease reporting systems;  
37  
38 202 this is one of the entry points for congenital rubella syndrome surveillance, where gaps limit the ability to  
39  
40 203 monitor progress towards its elimination.<sup>16</sup>

41 204 In this study, women living in Sejong city were the most protected from rubella infection (IgG+,  
42  
43 205 81.3%). In early 2007, the South Korean government had created a special administrative district from parts of  
44  
45 206 the South Chungcheong and North Chungcheong provinces, near Daejeon, to relocate nine ministries and four  
46  
47 207 national agencies from Seoul. Various government programs for encouraging more births, such as incentives, in  
48  
49 208 different regions may have affected the results.<sup>4</sup> In this study, less than 1,000 women had been tested for anti-  
50  
51 209 rubella IgG in the Gangwon province and Ulsan. This may affect the percent seropositivity of anti-rubella IgG  
52  
53 210 in the present study. Future studies are needed to define the effect of regional differences of government  
54  
55 211 strategies on rubella seroprevalences.

56  
57 212 One limitation of this study was the lack of clinical information, such as vaccination history or contact  
58  
59 213 history with rubella-infected individuals. However, we do not yet understand what surrogate markers, other than

1  
2  
3  
4 214 antibodies, show longer-term cell-mediated immunity and protection from disease.<sup>1</sup> Seroprevalence studies are  
5  
6 215 an essential tool to monitor the efficacy of vaccination programmes, to understand population immunity and to  
7  
8 216 identify populations at higher risk of infection.<sup>17</sup> This study is a cross-sectional study and merely descriptive  
9  
10 217 analyses were adopted in this study. The results of this study were prone to ascertainment bias. The present  
11  
12 218 study did not include men, women with older ages, or foreigners living in South Korea. Therefore, the findings  
13  
14 219 are not generalisable to these groups. A systems-level approach to understanding the development and  
15  
16 220 maintenance of acute and long-term immunity to rubella and a rubella-containing vaccine is needed.<sup>1</sup>  
17  
18 221  
19  
20

## 21 222 **Conclusions**

22  
23  
24 223 In conclusion, this study investigated immunization status of rubella among Korean women of childbearing age.  
25  
26 224 Considering the immunization status by age group and the increased prevalence of women with equivocal  
27  
28 225 results, future public health efforts should be focused on catch-up activities. The results of this study could be  
29  
30 226 used as foundational knowledge for strengthening disease control and prevention of rubella, including a  
31  
32 227 nationwide immunization program.  
33  
34 228

## 35 36 37 229 **Contributors**

38  
39  
40 230 All authors contributed to manuscript preparation; R. Choi, Y. Oh, Youngju Oh, and S.G. Lee collected the data  
41  
42 231 or contributed to data analysis; R. Choi and S.G. Lee designed the study; S.G. Lee had full access to all the data  
43  
44 232 in the study and takes responsibility for the integrity of the data and the accuracy of the data analysis. All  
45  
46 233 authors read and approved the final manuscript.  
47  
48 234

## 49 50 51 235 **Patient consent for publication**

52  
53  
54 236 Not required.  
55  
56 237

## 57 58 59 238 **Ethics approval**

60

1  
2  
3  
4 239 This study was approved by the Institutional Review Board of Green Cross Laboratories (GCL 2017-1010-02).  
5  
6

7 240  
8  
9

10 241 **Supplementary materials**  
11

12 242 Supplementary material associated with this article can be found, in the online version.  
13  
14  
15  
16  
17  
18  
19  
20  
21  
22  
23  
24  
25  
26  
27  
28  
29  
30  
31  
32  
33  
34  
35  
36  
37  
38  
39  
40  
41  
42  
43  
44  
45  
46  
47  
48  
49  
50  
51  
52  
53  
54  
55  
56  
57  
58  
59  
60

For peer review only

243 **References**

- 244 1. Lambert N, Strebel P, Orenstein W, et al. Rubella. *Lancet (London, England)* 2015;385(9984):2297-307. doi:  
245 10.1016/s0140-6736(14)60539-0 [published Online First: 2015/01/13]
- 246 2. WHO Fact sheet for Rubella. available at <https://www.who.int/en/news-room/fact-sheets/detail/rubella>, Jan  
247 2019. 2017
- 248 3. Dimech W, Mulders MN. A 16-year review of seroprevalence studies on measles and rubella. *Vaccine*  
249 2016;34(35):4110-8. doi: 10.1016/j.vaccine.2016.06.002 [published Online First: 2016/06/25]
- 250 4. Organization WH. Global Measles and Rubella Strategic plan 2012. 2012
- 251 5. Pandolfi E, Gesualdo F, Rizzo C, et al. Global seroprevalence of rubella among pregnant and childbearing  
252 age women: a meta-analysis. *European journal of public health* 2017 doi: 10.1093/eurpub/ckw259  
253 [published Online First: 2017/02/17]
- 254 6. Choe YJ, Eom HE, Cho SI. Trend of measles, mumps, and rubella incidence following the measles-rubella  
255 catch up vaccination in the Republic of Korea, 2001. *Journal of medical virology* 2017 doi:  
256 10.1002/jmv.24808 [published Online First: 2017/03/18]
- 257 7. Heo JY, Choe KW, Yoon CG, et al. Vaccination policy in Korean armed forces: current status and future  
258 challenge. *Journal of Korean medical science* 2015;30(4):353-9. doi: 10.3346/jkms.2015.30.4.353  
259 [published Online First: 2015/04/02]
- 260 8. Ki M, Kim MH, Choi BY, et al. Rubella antibody loss rates in Korean children. *Epidemiology and infection*  
261 2002;129(3):557-64. [published Online First: 2003/02/01]
- 262 9. Cho HK, Lee H, Kim HW, et al. Seroprevalences of Specific IgG Antibodies to Measles, Mumps, and  
263 Rubella in Korean Infants. *Journal of Korean medical science* 2016;31(12):1957-62. doi:  
264 10.3346/jkms.2016.31.12.1957 [published Online First: 2016/11/09]
- 265 10. Ki MR, Choi BY, Kim MH, et al. Rubella seroprevalence in Korean children. *Journal of Korean medical*  
266 *science* 2003;18(3):331-6. doi: 10.3346/jkms.2003.18.3.331 [published Online First: 2003/06/17]
- 267 11. Lee H, Kim HW, Cho HK, et al. Reappraisal of MMR vaccines currently used in Korea. *Pediatrics*  
268 *international : official journal of the Japan Pediatric Society* 2011;53(3):374-80. doi: 10.1111/j.1442-  
269 200X.2010.03244.x [published Online First: 2010/09/14]
- 270 12. Kim EY, Lee MS. Related factors of age-appropriate immunization among urban-rural children aged 24-35  
271 months in a 2005 population-based survey in Nonsan, Korea. *Yonsei medical journal* 2011;52(1):104-

- 1  
2  
3  
4 272 12. doi: 10.3349/ymj.2011.52.1.104 [published Online First: 2010/12/15]  
5  
6 273 13. Sedgwick P. Bias in observational study designs: cross sectional studies. *BMJ (Clinical research ed)*  
7  
8 274 2015;350:h1286. doi: 10.1136/bmj.h1286 [published Online First: 2015/03/10]  
9  
10 275 14. Salathe M, Jones JH. Dynamics and control of diseases in networks with community structure. *PLoS*  
11  
12 276 *computational biology* 2010;6(4):e1000736. doi: 10.1371/journal.pcbi.1000736 [published Online  
13  
14 277 First: 2010/04/14]  
15  
16 278 15. Xu Z, Zu Z, Zheng T, et al. Comparative analysis of the effectiveness of three immunization strategies in  
17  
18 279 controlling disease outbreaks in realistic social networks. *PloS one* 2014;9(5):e95911. doi:  
19  
20 280 10.1371/journal.pone.0095911 [published Online First: 2014/05/03]  
21  
22 281 16. Serena GM, Filomena GM, Vittoria LA, et al. Lack of immunity against rubella among Italian young adults.  
23  
24 282 *BMC infectious diseases* 2017;17(1):199. doi: 10.1186/s12879-017-2295-y [published Online First:  
25  
26 283 2017/03/09]  
27  
28 284 17. Dimech W, Mulders MN. A review of testing used in seroprevalence studies on measles and rubella.  
29  
30 285 *Vaccine* 2016;34(35):4119-22. doi: 10.1016/j.vaccine.2016.06.006 [published Online First:  
31  
32 286 2016/06/25]  
33  
34 287 18. Schoub BD, Harris BN, McAnerney J, et al. Rubella in South Africa: an impending Greek tragedy? *South*  
35  
36 288 *African Medical Journal* 2009;99(7)  
37  
38 289 19. Inagaki AD, Oliveira LA, Oliveira MF, et al. [Seroprevalence of antibodies for toxoplasmosis, rubella,  
39  
40 290 cytomegalovirus, syphilis and HIV among pregnant women in Sergipe]. *Revista da Sociedade*  
41  
42 291 *Brasileira de Medicina Tropical* 2009;42(5):532-6. [published Online First: 2009/12/08]  
43  
44 292 20. Artimos de Oliveira S, Bastos Camacho LA, Uzeda Barreto MC, et al. Serologic status of women in an  
45  
46 293 urban population in Brazil before and after rubella immunization campaign using routine screening  
47  
48 294 data. *The Journal of infectious diseases* 2011;204 Suppl 2:S664-8. doi: 10.1093/infdis/jir356  
49  
50 295 [published Online First: 2011/10/05]  
51  
52 296 21. Avila Moura A, Mello MJG, Correia JB. Serological statuses of pregnant women in an urban Brazilian  
53  
54 297 population before and after the 2008 rubella immunization campaign. *Vaccine* 2016;34(4):445-50. doi:  
55  
56 298 10.1016/j.vaccine.2015.12.019 [published Online First: 2015/12/29]  
57  
58 299 22. McElroy R, Laskin M, Jiang D, et al. Rates of rubella immunity among immigrant and non-immigrant  
59  
60 300 pregnant women. *Journal of obstetrics and gynaecology Canada : JOGC = Journal d'obstetrique et*  
301 *gynecologie du Canada : JOGC* 2009;31(5):409-13. [published Online First: 2009/07/17]

- 1  
2  
3  
4 302 23. Lim GH, Harris T, Desai S, et al. Rubella immunity among prenatal women in Ontario, 2006-2010. *BMC*  
5  
6 303 *infectious diseases* 2013;13:362. doi: 10.1186/1471-2334-13-362 [published Online First: 2013/08/07]  
7  
8 304 24. Lai FY, Dover DC, Lee B, et al. Determining rubella immunity in pregnant Alberta women 2009-2012.  
9  
10 305 *Vaccine* 2015;33(5):635-41. doi: 10.1016/j.vaccine.2014.12.022 [published Online First: 2014/12/24]  
11  
12 306 25. Madi N, Al-Tawalah H, Abdul Khalik D, et al. A relatively high number of pregnant women in Kuwait  
13  
14 307 remain susceptible to rubella: a need for an alternative vaccination policy. *Medical principles and*  
15  
16 308 *practice : international journal of the Kuwait University, Health Science Centre* 2014;23(2):145-8. doi:  
17  
18 309 10.1159/000356892 [published Online First: 2014/01/18]  
19  
20 310 26. Belefquih B, Kasouati J, Doblali T, et al. Rubella seroprevalence in pregnant women at the military teaching  
21  
22 311 hospital, Rabat, Morocco. *International journal of gynaecology and obstetrics: the official organ of the*  
23  
24 312 *International Federation of Gynaecology and Obstetrics* 2013;120(2):191-2. doi:  
25  
26 313 10.1016/j.ijgo.2012.08.026 [published Online First: 2012/11/28]  
27  
28 314 27. Alsibiani SA. Rubella Immunity among Pregnant Women in Jeddah, Western Region of Saudi Arabia.  
29  
30 315 *Obstetrics and gynecology international* 2014;2014:659838. doi: 10.1155/2014/659838 [published  
31  
32 316 Online First: 2014/07/22]  
33  
34 317 28. Byrne L, Brant L, Reynolds C, et al. Seroprevalence of low rubella IgG antibody levels among antenatal  
35  
36 318 women in England tested by NHS Blood and Transplant: 2004-2009. Is rubella susceptibility  
37  
38 319 increasing? *Vaccine* 2012;30(2):161-7. doi: 10.1016/j.vaccine.2011.11.045 [published Online First:  
39  
40 320 2011/11/29]  
41  
42 321 29. Enders M, Bartelt U, Knotek F, et al. Performance of the Elecsys Rubella IgG assay in the diagnostic  
43  
44 322 laboratory setting for assessment of immune status. *Clinical and vaccine immunology : CVI*  
45  
46 323 2013;20(3):420-6. doi: 10.1128/cvi.00688-12 [published Online First: 2013/01/25]  
47  
48 324 30. O'Dwyer V, Bonham S, Mulligan A, et al. Antenatal rubella immunity in Ireland. *Irish medical journal*  
49  
50 325 2013;106(8):232-5. [published Online First: 2013/11/29]  
51  
52 326 31. De Paschale M, Manco MT, Paganini A, et al. Rubella antibody screening during pregnancy in an urban area  
53  
54 327 of Northern Italy. *Infectious disease reports* 2012;4(1):e17. doi: 10.4081/idr.2012.e17 [published  
55  
56 328 Online First: 2012/01/02]  
57  
58 329 32. Vilajeliu A, Garcia-Basteiro AL, Valencia S, et al. Rubella susceptibility in pregnant women and results of a  
59  
60 330 postpartum immunization strategy in Catalonia, Spain. *Vaccine* 2015;33(15):1767-72. doi:  
331 331 10.1016/j.vaccine.2015.02.043 [published Online First: 2015/03/04]



- 1  
2  
3  
4 332 33. Kakoulidou M, Forsgren M, Lewensohn-Fuchs I, et al. Serum levels of rubella-specific antibodies in  
5  
6 333 Swedish women following three decades of vaccination programmes. *Vaccine* 2010;28(4):1002-7. doi:  
7  
8 334 10.1016/j.vaccine.2009.10.130 [published Online First: 2009/11/21]  
9  
10 335 34. Tamer GS, Dundar D, Caliskan E. Seroprevalence of *Toxoplasma gondii*, rubella and cytomegalovirus  
11  
12 336 among pregnant women in western region of Turkey. *Clinical and investigative medicine Medecine*  
13  
14 337 *clinique et experimentale* 2009;32(1):E43-7. [published Online First: 2009/01/31]  
15  
16 338 35. Uysal A, Taner CE, Cüce M, et al. Cytomegalovirus and rubella seroprevalence in pregnant women in  
17  
18 339 Izmir/Turkey: follow-up and results of pregnancy outcome. *Archives of Gynecology and Obstetrics*  
19  
20 340 2012;286(3):605-08. doi: 10.1007/s00404-012-2353-z  
21  
22 341 36. Matthews LA, Lawrance LM, Gray D, et al. An audit of rubella IgG antibody status in antenatal women in a  
23  
24 342 NHS Trust over 5 years (2005-2009). *Epidemiology and infection* 2011;139(11):1720-6. doi:  
25  
26 343 10.1017/s0950268810002748 [published Online First: 2010/12/09]  
27  
28 344 37. Ogundele M, Ghebrehwet S, Chawla A. Some factors affecting rubella seronegative prevalence among  
29  
30 345 pregnant women in a North West England region between April 2011 and March 2013. *Journal of*  
31  
32 346 *public health (Oxford, England)* 2016;38(2):243-9. doi: 10.1093/pubmed/fdv033 [published Online  
33  
34 347 First: 2015/03/20]  
35  
36 348 38. Upreti SR, Thapa K, Pradhan YV, et al. Developing rubella vaccination policy in Nepal--results from rubella  
37  
38 349 surveillance and seroprevalence and congenital rubella syndrome studies. *The Journal of infectious*  
39  
40 350 *diseases* 2011;204 Suppl 1:S433-8. doi: 10.1093/infdis/jir078 [published Online First: 2011/06/17]  
41  
42 351 39. Miyakawa M, Yoshino H, Yoshida LM, et al. Seroprevalence of rubella in the cord blood of pregnant  
43  
44 352 women and congenital rubella incidence in Nha Trang, Vietnam. *Vaccine* 2014;32(10):1192-8. doi:  
45  
46 353 10.1016/j.vaccine.2013.08.076 [published Online First: 2013/09/12]  
47  
48 354 40. Nardone A, Tischer A, Andrews N, et al. Comparison of rubella seroepidemiology in 17 countries: progress  
49  
50 355 towards international disease control targets. *Bulletin of the World Health Organization*  
51  
52 356 2008;86(2):118-25. [published Online First: 2008/02/26]  
53  
54 357 41. Okuda M, Yamanaka M, Takahashi T, et al. Positive rates for rubella antibody in pregnant women and  
55  
56 358 benefit of post-partum vaccination in a Japanese perinatal center. *The journal of obstetrics and*  
57  
58 359 *gynaecology research* 2008;34(2):168-73. doi: 10.1111/j.1447-0756.2007.00689.x [published Online  
59  
60 360 First: 2008/04/17]  
61 361 42. Hanaoka M, Hisano M, Watanabe N, et al. Changes in the prevalence of the measles, rubella, varicella-

- 1  
2  
3  
4 362 zoster, and mumps virus antibody titers in Japanese pregnant women. *Vaccine* 2013;31(19):2343-7.  
5  
6 363 doi: 10.1016/j.vaccine.2013.03.012 [published Online First: 2013/03/26]  
7  
8 364 43. Yamada T, Mochizuki J, Hanaoka M, et al. Effects of campaign for postpartum vaccination on seronegative  
9  
10 365 rate against rubella among Japanese women. *BMC infectious diseases* 2014;14:152. doi: 10.1186/1471-  
11  
12 366 2334-14-152 [published Online First: 2014/03/22]  
13  
14 367 44. Liu F, Zhang S, Liu J, et al. Sociodemographic and economic characteristics of susceptibility to rubella  
15  
16 368 among women preparing for pregnancy in rural China. *International journal of infectious diseases :  
17  
18 369 IJID : official publication of the International Society for Infectious Diseases* 2017;62:112-18. doi:  
19  
20 370 10.1016/j.ijid.2017.07.013 [published Online First: 2017/07/26]  
21  
22 371 45. Lin CC, Yang CY, Shih YL, et al. Rubella seroepidemiology and estimations of the catch-up immunisation  
23  
24 372 rate and persistence of antibody titers in pregnant women in Taiwan. *BJOG : an international journal  
25  
26 373 of obstetrics and gynaecology* 2011;118(6):706-12. doi: 10.1111/j.1471-0528.2011.02903.x [published  
27  
28 374 Online First: 2011/03/10]  
29  
30 375 46. Lin CC, Yang CY, Shih YL, et al. Persistence and titer changes of rubella virus antibodies in primiparous  
31  
32 376 women who had been vaccinated with strain RA 27/3 in junior high school. *Clinical and vaccine  
33  
34 377 immunology : CVI* 2012;19(1):1-4. doi: 10.1128/cvi.05334-11 [published Online First: 2011/11/11]  
35  
36  
37  
38  
39  
40  
41  
42  
43  
44  
45  
46  
47  
48  
49  
50  
51  
52  
53  
54  
55  
56  
57  
58  
59  
60

379 **Table 1** Age distribution each year of 327,637 Korean women tested for rubella IgG antibodies.

| □           | 2010   | 2011   | 2012   | 2013   | 2014   | 2015   | 2016   | 2017   | Total           |
|-------------|--------|--------|--------|--------|--------|--------|--------|--------|-----------------|
| 15-20 years | 429    | 586    | 603    | 538    | 557    | 520    | 518    | 358    | 4,109 (1.3%)    |
|             | 1.1%   | 1.4%   | 1.4%   | 1.3%   | 1.4%   | 1.3%   | 1.3%   | 0.9%   |                 |
| 21-30 years | 17,189 | 18,130 | 17,850 | 15,922 | 14,856 | 14,543 | 13,962 | 12,874 | 125,326 (38.3%) |
|             | 45.7%  | 44.0%  | 40.1%  | 38.1%  | 37.0%  | 35.0%  | 33.8%  | 32.7%  |                 |
| 31-40 years | 19,187 | 21,604 | 24,626 | 24,256 | 23,617 | 25,282 | 25,521 | 24,692 | 188,785 (57.6%) |
|             | 51.0%  | 52.4%  | 55.3%  | 58.0%  | 58.8%  | 60.8%  | 61.8%  | 62.7%  |                 |
| 41-49 years | 802    | 902    | 1,477  | 1,114  | 1,130  | 1,229  | 1,281  | 1,482  | 9,417 (2.9%)    |
|             | 2.1%   | 2.2%   | 3.3%   | 2.7%   | 2.8%   | 3.0%   | 3.1%   | 3.8%   |                 |
| □           | 37,607 | 41,222 | 44,556 | 41,830 | 40,160 | 41,574 | 41,282 | 39,406 | 327,637         |

380

381

382 **Table 2** Trend of immunization status among Korean women of childbearing age over an 8-year period.

| □    | Positive |       | Equivocal |       | Negative |      | Total  |
|------|----------|-------|-----------|-------|----------|------|--------|
|      | n        | %     | n         | %     | n        | %    |        |
| 2010 | 30,460   | 81.0% | 4,055     | 10.8% | 3,092    | 8.2% | 37,607 |
| 2011 | 31,589   | 76.6% | 5,627     | 13.7% | 4,006    | 9.7% | 41,222 |
| 2012 | 34,102   | 76.5% | 6,472     | 14.5% | 3,982    | 8.9% | 44,556 |
| 2013 | 31,415   | 75.1% | 6,545     | 15.6% | 3,870    | 9.3% | 41,830 |
| 2014 | 31,154   | 77.6% | 5,887     | 14.7% | 3,119    | 7.8% | 40,160 |
| 2015 | 31,692   | 76.2% | 6,584     | 15.8% | 3,298    | 7.9% | 41,574 |
| 2016 | 31,172   | 75.5% | 6,626     | 16.1% | 3,484    | 8.4% | 41,282 |
| 2017 | 28,749   | 73.0% | 6,929     | 17.6% | 3,728    | 9.5% | 39,406 |

383

384 **Table 3** Previous studies on rubella seronegativity in women that included more than 1,000 subjects and were published within the past 10 years, grouped by World Health  
 385 Organization region.

| WHO region | Publication year | N       | Country           | Seronegativity (%) | Population | Reference                                | Measurement method                                                           |
|------------|------------------|---------|-------------------|--------------------|------------|------------------------------------------|------------------------------------------------------------------------------|
| AFR        | 2009             | 7,430   | South Africa      | 6.2                | WCBA       | Schoub et al. <sup>18</sup>              | Bio-Rad Platelia Rubella IgG ELISA                                           |
| AMR        | 2009             | 8,939   | Brazil            | 28.4               | Pregnant   | Inagaki et al. <sup>19</sup>             | Q-Preven IgG-DBS kit                                                         |
| AMR        | 2011             | 9,610   | Brazil            | 11.6               | Pregnant   | Artimos de Oliveira et al. <sup>20</sup> | Beckman Coulter Access RUBELLA IgG ChLIA or bioMérieux VIDAS RUB IgG II ELFA |
| AMR        | 2016             | 54,717  | Brazil            | 4.5                | Pregnant   | Avila Moura et al. <sup>21</sup>         | Q-Preven IgG-DBS kit                                                         |
| AMR        | 2009             | 5,783   | Canada            | 7.0                | Pregnant   | McElroy et al. <sup>22</sup>             | Hemagglutination inhibition test                                             |
| AMR        | 2013             | 459,963 | Canada            | 4.4                | WCBA       | Lim et al. <sup>23</sup>                 | Abbott AxSYM Rubella IgG MEIA                                                |
| AMR        | 2015             | 157,763 | Canada            | 15.9               | Pregnant   | Lai et al. <sup>24</sup>                 | Abbott ARCHITECT Rubella IgG CMIA                                            |
| EMR        | 2014             | 4,062   | Kuwait            | 6.8                | Pregnant   | Madi et al. <sup>25</sup>                | Abbott ARCHITECT Rubella IgG CMIA                                            |
| EMR        | 2013             | 2,284   | Morocco           | 9.8                | Pregnant   | Belefqih et al. <sup>26</sup>            | Siemens Enzygnost Anti-Rubella-Virus IgG EIA                                 |
| EMR        | 2014             | 10,276  | Saudi Arabia      | 8.7                | Pregnant   | Sharifa et al. <sup>27</sup>             | Dade Behring ELISA BP III                                                    |
| EUR        | 2012             | 424,876 | England           | 2.6                | Pregnant   | Byrne et al. <sup>28</sup>               | Microgen Mercia Rubella G EIA                                                |
| EUR        | 2013             | 1,090   | Germany           | 1.6                | Pregnant   | Enders et al. <sup>29</sup>              | Hemagglutination inhibition test                                             |
| EUR        | 2013             | 74,810  | Ireland           | 6.2                | Pregnant   | O'Dwyer et al. <sup>30</sup>             | Method not described                                                         |
| EUR        | 2012             | 2,385   | Italy             | 8.0                | Pregnant   | De Paschale et al. <sup>31</sup>         | DiaSorin ETI-RUBEK-G PLUS EIA                                                |
| EUR        | 2015             | 22,681  | Spain             | 5.9                | Pregnant   | Vilajeliu et al. <sup>32</sup>           | Siemens ADVIA Centaur Rubella G ChLIA                                        |
| EUR        | 2010             | 41,637  | Sweden            | 4.2                | Pregnant   | Kakoulidou et al. <sup>33</sup>          | Abbott AxSYM Rubella IgG MEIA                                                |
| EUR        | 2009             | 1,972   | Turkey            | 3.9                | Pregnant   | Tamer et al. <sup>34</sup>               | Abbott AxSYM Rubella IgG MEIA                                                |
| EUR        | 2012             | 5,959   | Turkey            | 1.9                | Pregnant   | Uysal et al. <sup>35</sup>               | bioMérieux VIDAS RUB IgG II ELFA                                             |
| EUR        | 2011             | 11,987  | UK                | 4.4                | Pregnant   | Matthews et al. <sup>36</sup>            | DiaSorin ETI-RUBEK-G EIA                                                     |
| EUR        | 2016             | 19,046  | UK                | 6.3                | Pregnant   | Ogundele et al. <sup>37</sup>            | Roche E602 MODULAR analyzer                                                  |
| SEAR       | 2011             | 2,224   | Nepal             | 9.2                | WCBA       | Upreti et al. <sup>38</sup>              | Enzygnost Anti-Rubella-Virus IgG EIA                                         |
| SEAR       | 2014             | 1,988   | Vietnam           | 28.9               | Pregnant   | Miyakawa et al. <sup>39</sup>            | bioMérieux Mini VIDAS EIA                                                    |
| WPR        | 2008             | 1,020   | Australia         | 2.7                | WCBA       | Nardone et al. <sup>40</sup>             | Siemens Enzygnost Anti-Rubella-Virus IgG EIA                                 |
| WPR        | 2008             | 2,741   | Japan             | 6.7                | Pregnant   | Okuda et al. <sup>41</sup>               | Hemagglutination inhibition test                                             |
| WPR        | 2013             | 13,924  | Japan             | 2.7                | Pregnant   | Hanaoka et al. <sup>42</sup>             | Hemagglutination inhibition test                                             |
| WPR        | 2014             | 20,363  | Japan             | 4.7                | Pregnant   | Yamada et al. <sup>43</sup>              | Hemagglutination inhibition test                                             |
| WPR        | 2017             | 782,293 | China             | 33.8               | WCBA       | Liu et al. <sup>44</sup>                 | Method not described                                                         |
| WPR        | 2011             | 43,640  | Taiwan            | 10.9               | Pregnant   | Lin et al. <sup>45</sup>                 | Abbott AxSYM Rubella IgG MEIA and Beckman Coulter Access RUBELLA IgG ChLIA   |
| WPR        | 2012             | 14,090  | Taiwan            | 6.5                | Pregnant   | Lin et al. <sup>46</sup>                 | Abbott AxSYM Rubella IgG MEIA                                                |
| WPR        | 2019             | 327,637 | Republic of Korea | 8.7                | WCBA       | This study                               | Abbott ARCHITECT Rubella IgG CMIA                                            |

1  
2  
3 386 Abbreviations: AFR, Africa Region; AMR, American Region; EMR, Middle East Region; EUR, European Region; SEAR, East Asian Region; WCBA, Women of  
4  
5 387 childbearing age; WHO, World Health Organization; WPR, Western Pacific Region.  
6  
7  
8  
9  
10  
11  
12  
13  
14  
15  
16  
17  
18  
19  
20  
21  
22  
23  
24  
25  
26  
27  
28  
29  
30  
31  
32  
33  
34  
35  
36  
37  
38  
39  
40  
41  
42  
43  
44  
45  
46

For peer review only

1  
2  
3  
4  
5  
6  
7  
8  
9  
10  
11  
12  
13  
14  
15  
16  
17  
18  
19  
20  
21  
22  
23  
24  
25  
26  
27  
28  
29  
30  
31  
32  
33  
34  
35  
36  
37  
38  
39  
40  
41  
42  
43  
44  
45  
46  
47  
48  
49  
50  
51  
52  
53  
54  
55  
56  
57  
58  
59  
60

388 **Figure Legends**

389

390 **Figure 1** Trend of immunization status among Korean women of childbearing age over an 8 year period (2010-  
391 2017). Numbers of women (left axis) and the percentage of rubella specific IgG results (right axis) are plotted  
392 against years they have tested.

393

394 **Figure 2** Percent positive rate of rubella-specific IgG antibody in South Korea.

395

For peer review only

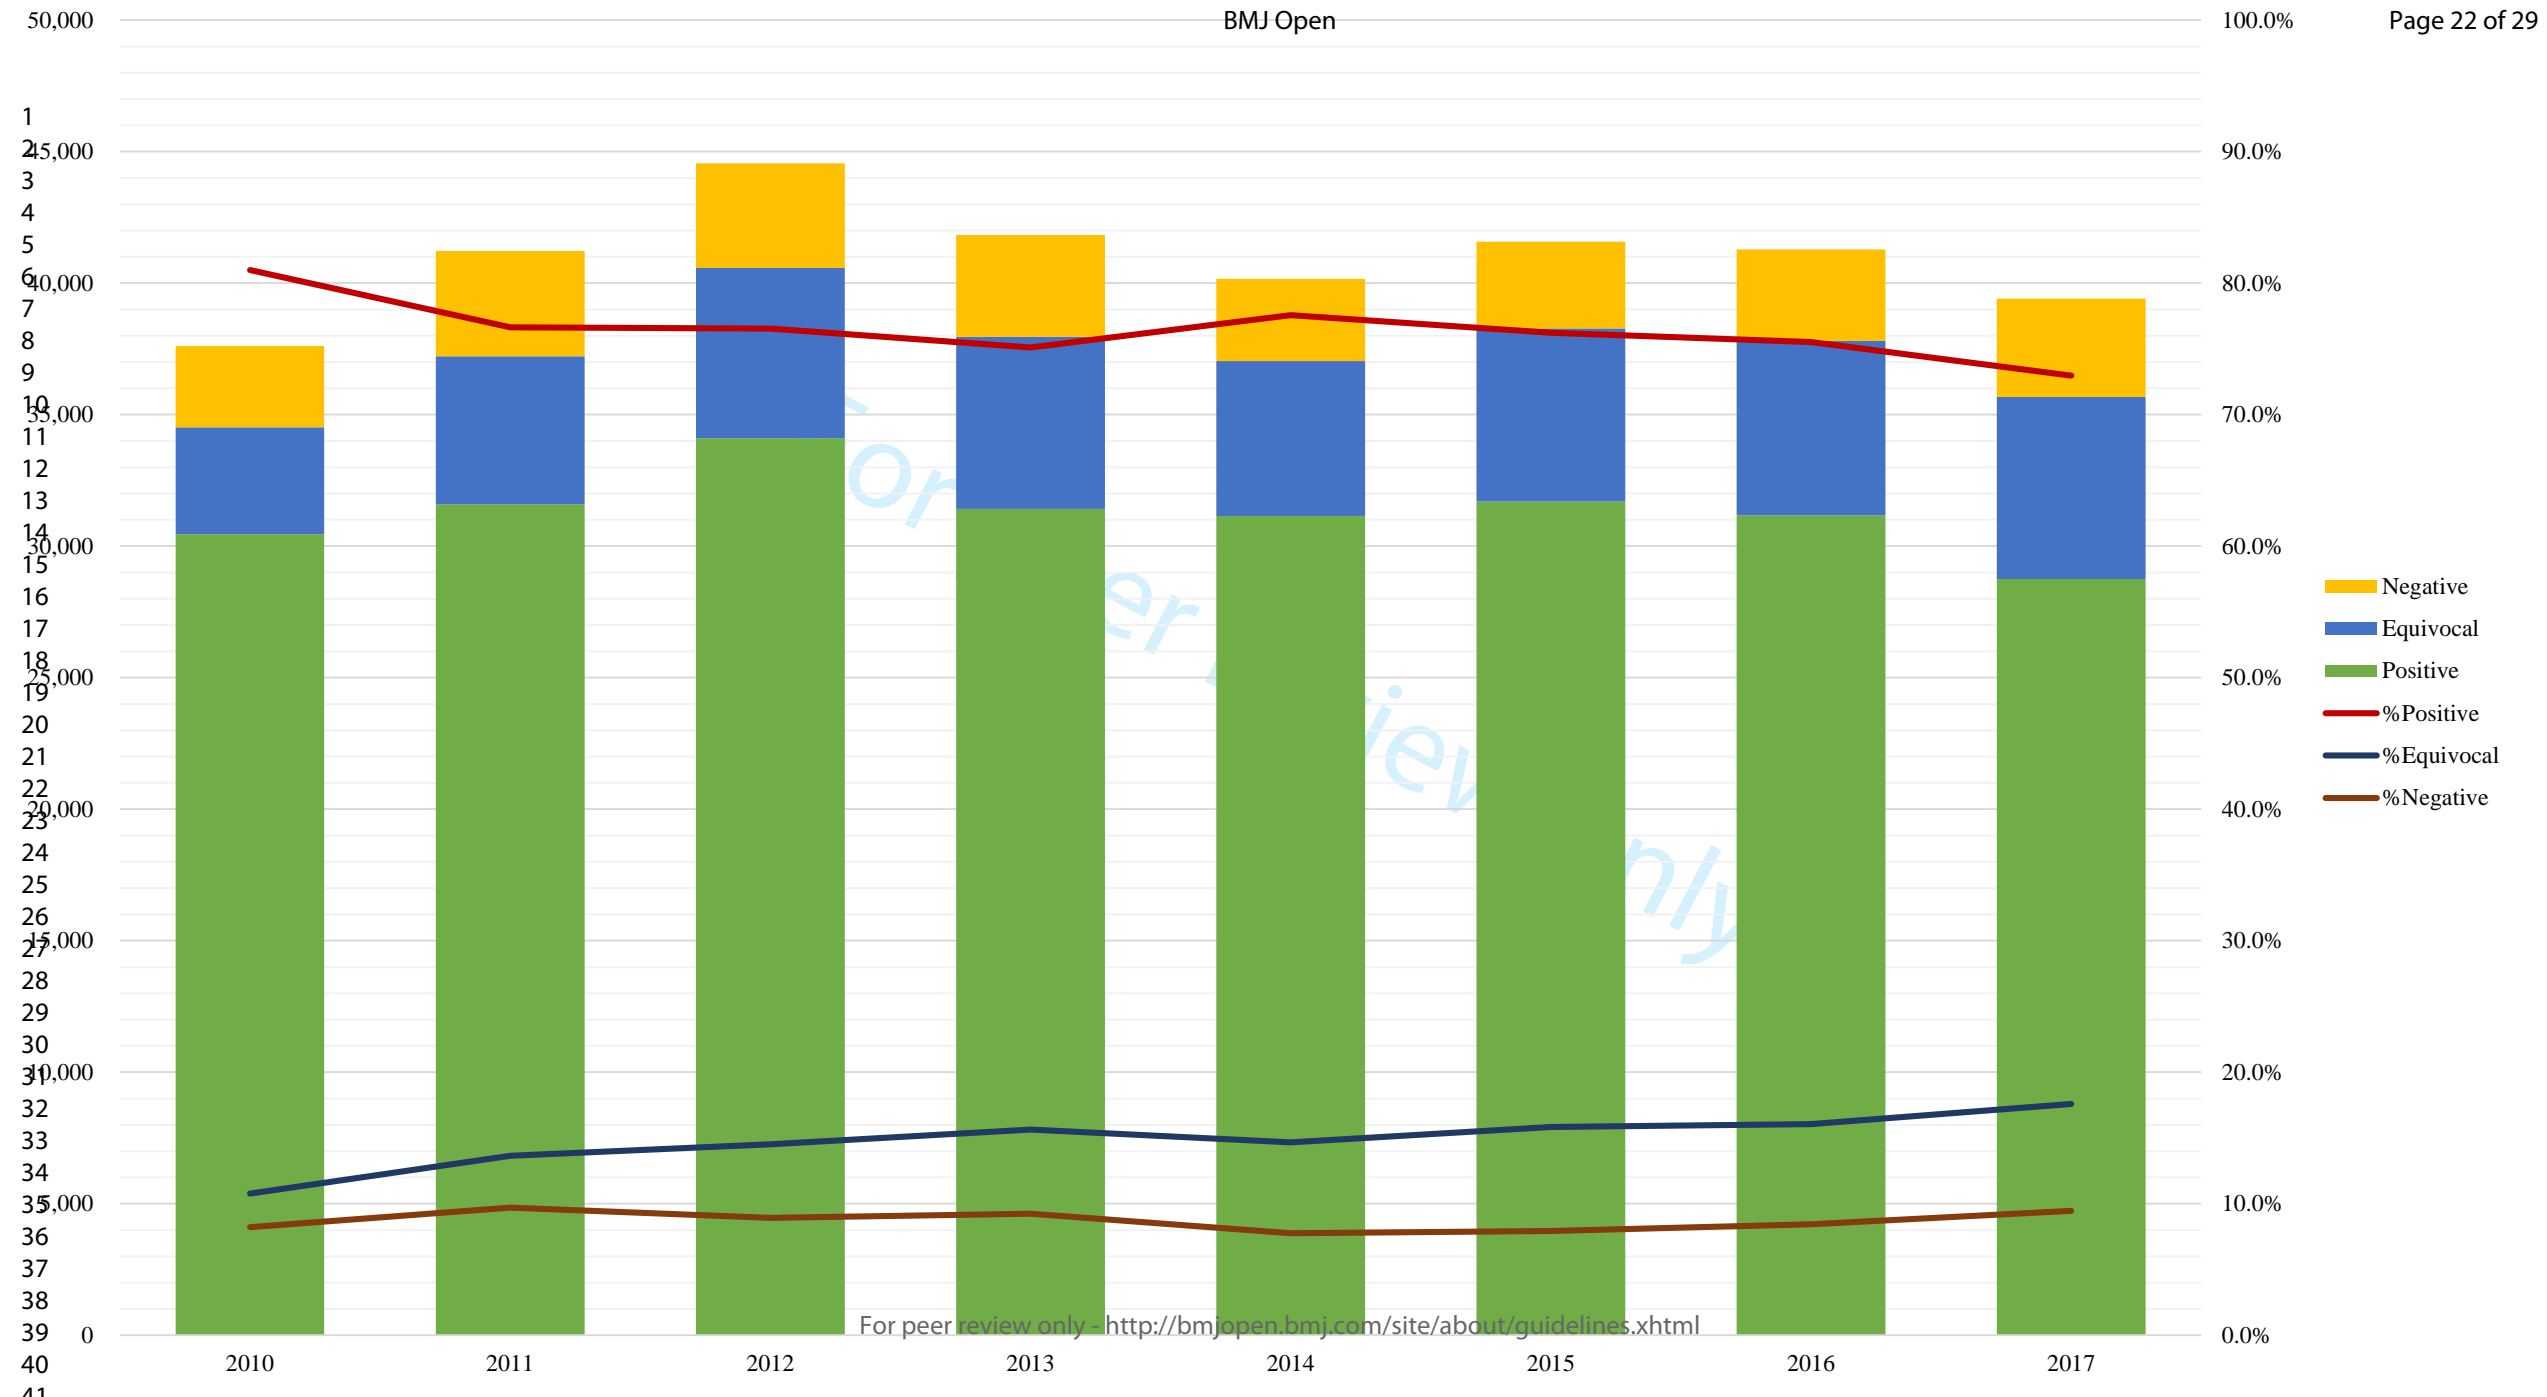



% positive for anti-rubella IgG Ab

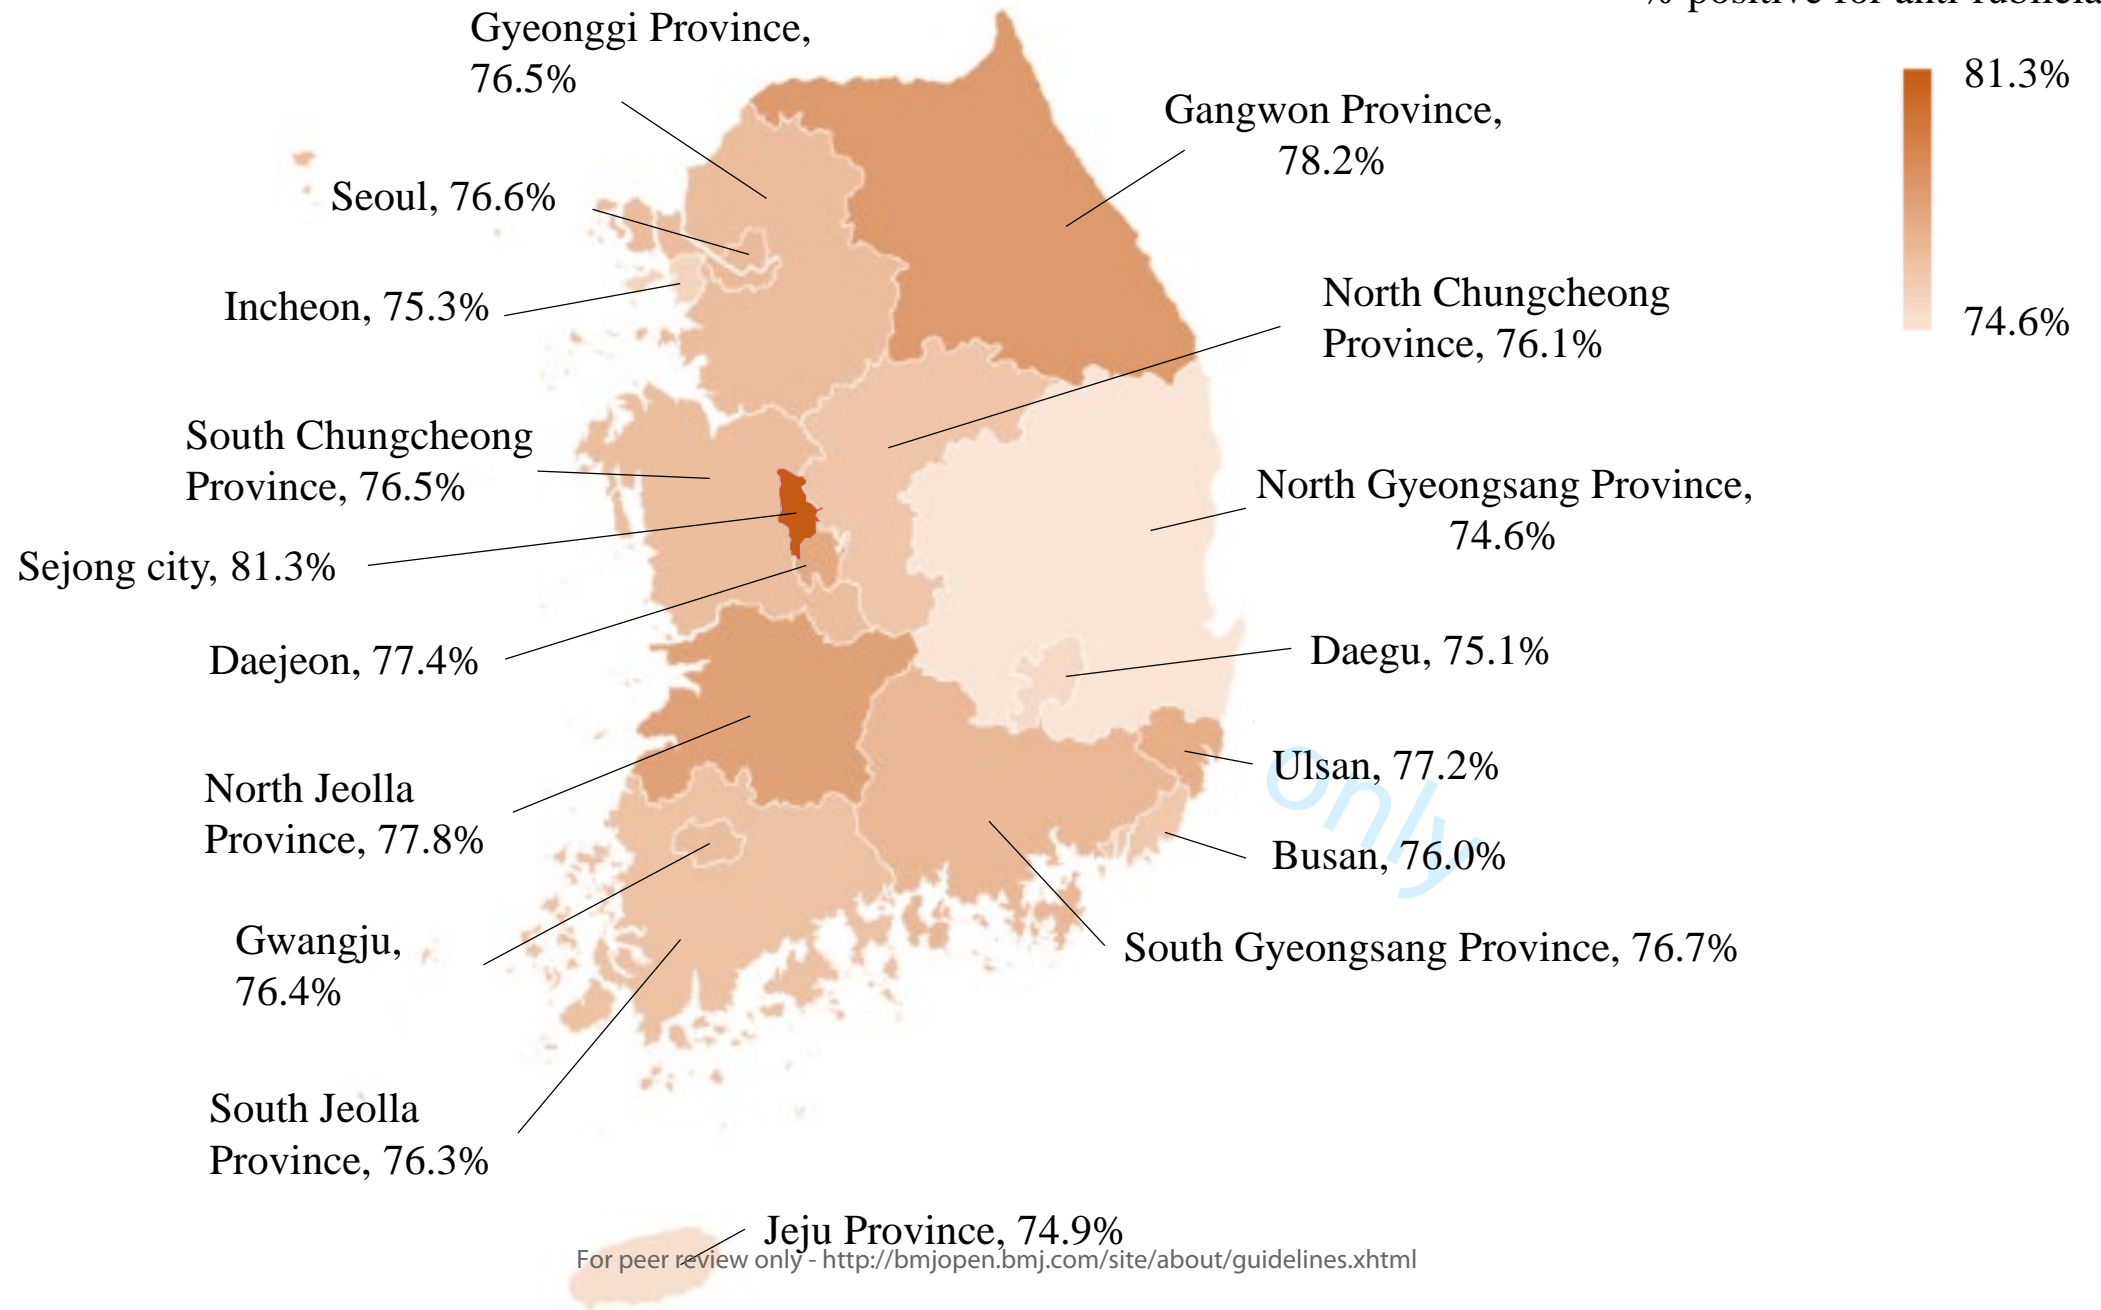

1  
2  
3  
4  
5  
6  
7  
8  
9  
10  
11  
12  
13  
14  
15  
16  
17  
18  
19  
20  
21  
22  
23  
24  
25  
26  
27  
28  
29  
30  
31  
32  
33  
34  
35  
36  
37  
38  
39  
40  
41

**Supplementary Table S1.** Rubella-specific IgG antibody in South Korea by geographic region.

| Region                     | Positive | Equivocal | Negative | Total  | %Positive | %Equivocal | %Negative |
|----------------------------|----------|-----------|----------|--------|-----------|------------|-----------|
| Gyeonggi Province          | 100240   | 19766     | 11048    | 131054 | 76.5%     | 15.1%      | 8.4%      |
| Seoul                      | 49817    | 9634      | 5561     | 65012  | 76.6%     | 14.8%      | 8.6%      |
| Jeju Province              | 17527    | 3515      | 2358     | 23400  | 74.9%     | 15.0%      | 10.1%     |
| Daegu                      | 10973    | 2337      | 1296     | 14606  | 75.1%     | 16.0%      | 8.9%      |
| South Jeolla Province      | 10552    | 1813      | 1470     | 13835  | 76.3%     | 13.1%      | 10.6%     |
| Daejeon                    | 9657     | 1844      | 968      | 12469  | 77.4%     | 14.8%      | 7.8%      |
| Busan                      | 9391     | 1795      | 1173     | 12359  | 76.0%     | 14.5%      | 9.5%      |
| North Jeolla Province      | 9307     | 1602      | 1051     | 11960  | 77.8%     | 13.4%      | 8.8%      |
| North Chungcheong Province | 8363     | 1718      | 905      | 10986  | 76.1%     | 15.6%      | 8.2%      |
| Incheon                    | 7236     | 1500      | 868      | 9604   | 75.3%     | 15.6%      | 9.0%      |
| South Chungcheong Province | 6413     | 1290      | 684      | 8387   | 76.5%     | 15.4%      | 8.2%      |
| South Gyeongsang Province  | 3415     | 591       | 447      | 4453   | 76.7%     | 13.3%      | 10.0%     |
| Sejong City                | 3218     | 469       | 270      | 3957   | 81.3%     | 11.9%      | 6.8%      |
| North Gyeongsang Province  | 1577     | 343       | 195      | 2115   | 74.6%     | 16.2%      | 9.2%      |
| Gwangju                    | 1570     | 291       | 193      | 2054   | 76.4%     | 14.2%      | 9.4%      |
| Gangwon Province           | 552      | 104       | 50       | 706    | 78.2%     | 14.7%      | 7.1%      |
| Ulsan                      | 525      | 113       | 42       | 680    | 77.2%     | 16.6%      | 6.2%      |

**Supplementary Table S2.** Positive rate of rubella-specific IgG antibody in South Korea by geographic region and year.

| Region                     | 2010  | 2011  | 2012  | 2013  | 2014  | 2015  | 2016  | 2017   | 2010-2017 |
|----------------------------|-------|-------|-------|-------|-------|-------|-------|--------|-----------|
| Gyeonggi Province          | 80.6% | 76.4% | 76.8% | 75.6% | 78.1% | 76.6% | 75.7% | 73.2%  | 76.5%     |
| Seoul                      | 81.9% | 76.6% | 76.8% | 75.4% | 77.9% | 76.3% | 75.6% | 73.9%  | 76.6%     |
| Jeju Province              | 79.5% | 75.9% | 76.0% | 74.1% | 75.9% | 73.5% | 74.0% | 71.2%  | 74.9%     |
| Daegu                      | 80.0% | 76.4% | 74.8% | 73.4% | 73.5% | 73.2% | 71.6% | 75.7%  | 75.1%     |
| South Jeolla Province      | 80.7% | 76.8% | 71.8% | 69.6% | 76.4% | 74.6% | 75.4% | 72.6%  | 76.3%     |
| Daejeon                    | 82.0% | 77.9% | 77.1% | 74.8% | 79.5% | 76.4% | 77.3% | 74.0%  | 77.4%     |
| Busan                      | 79.8% | 76.4% | 75.6% | 74.3% | 75.1% | 74.4% | 74.7% | 71.2%  | 76.0%     |
| North Jeolla Province      | 80.2% | 77.2% | 78.9% | 77.5% | 80.5% | 77.8% | 76.7% | 72.4%  | 77.8%     |
| North Chungcheong Province | 82.6% | 75.2% | 76.7% | 73.6% | 77.8% | 76.2% | 74.4% | 71.0%  | 76.1%     |
| Incheon                    | 81.6% | 77.0% | 79.2% | 77.3% | 79.1% | 77.1% | 74.9% | 70.7%  | 75.3%     |
| South Chungcheong Province | 85.5% | 76.9% | 76.2% | 74.3% | 76.4% | 76.9% | 76.5% | 73.6%  | 76.5%     |
| South Gyeongsang Province  | 81.4% | 76.9% | 72.1% | 72.9% | 73.6% | 74.6% | 83.0% | 68.2%  | 76.7%     |
| Sejong City                | 82.2% | 83.8% | 80.2% | 81.6% | 83.5% | 80.3% | 83.2% | 70.2%  | 81.3%     |
| North Gyeongsang Province  | 71.8% | 68.0% | 74.2% | 76.9% | 78.0% | 76.5% | 72.4% | 68.9%  | 74.6%     |
| Gwangju                    | 82.2% | 77.0% | 78.3% | 75.8% | 77.8% | 80.0% | 78.2% | 71.3%  | 76.4%     |
| Gangwon Province           | 81.7% | 60.0% | 80.0% | 94.3% | 87.0% | 82.9% | 78.3% | 73.3%  | 78.2%     |
| Ulsan                      | 93.3% | 75.4% | 71.3% | 84.3% | 73.1% | 80.7% | 75.0% | 100.0% | 77.2%     |

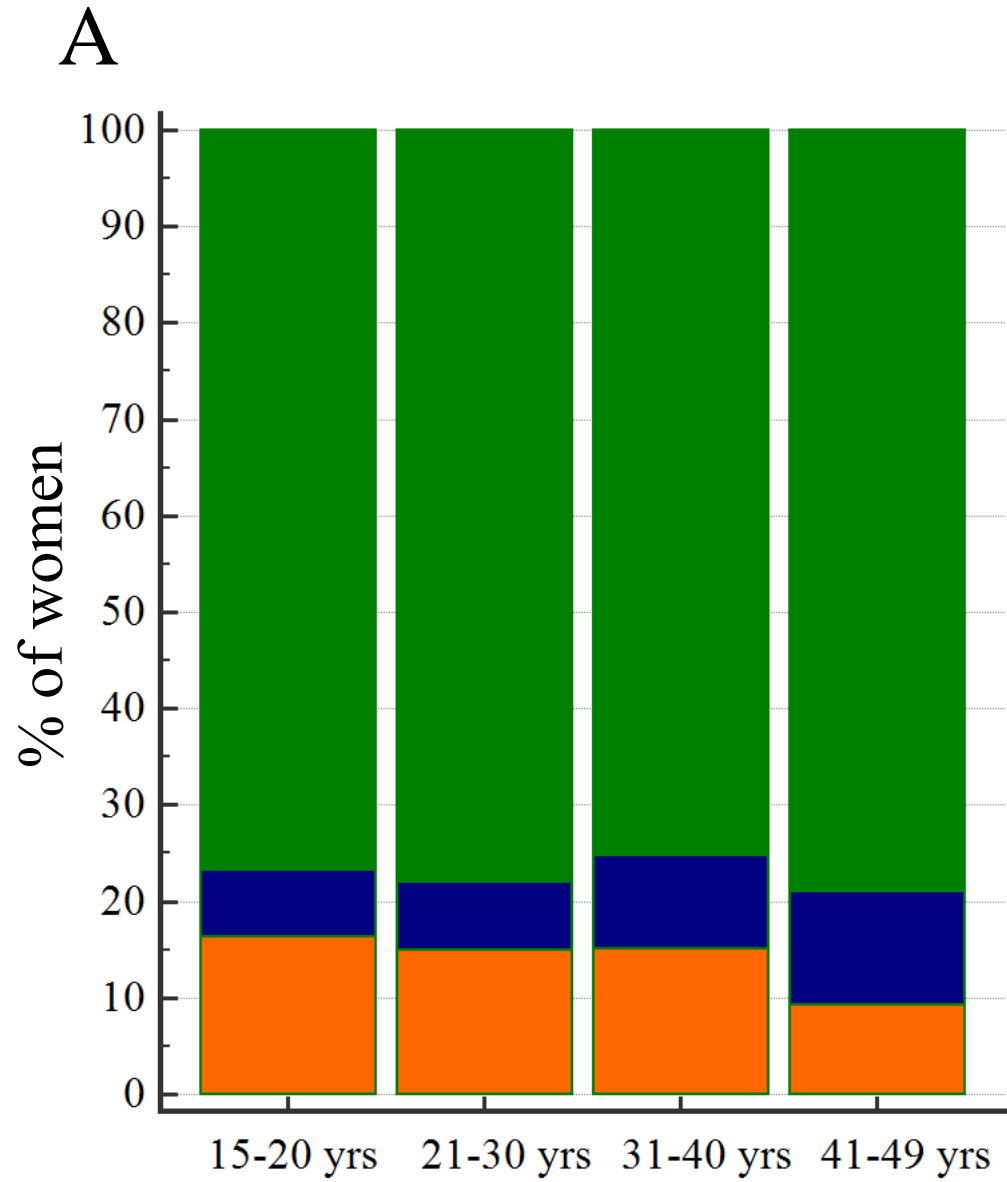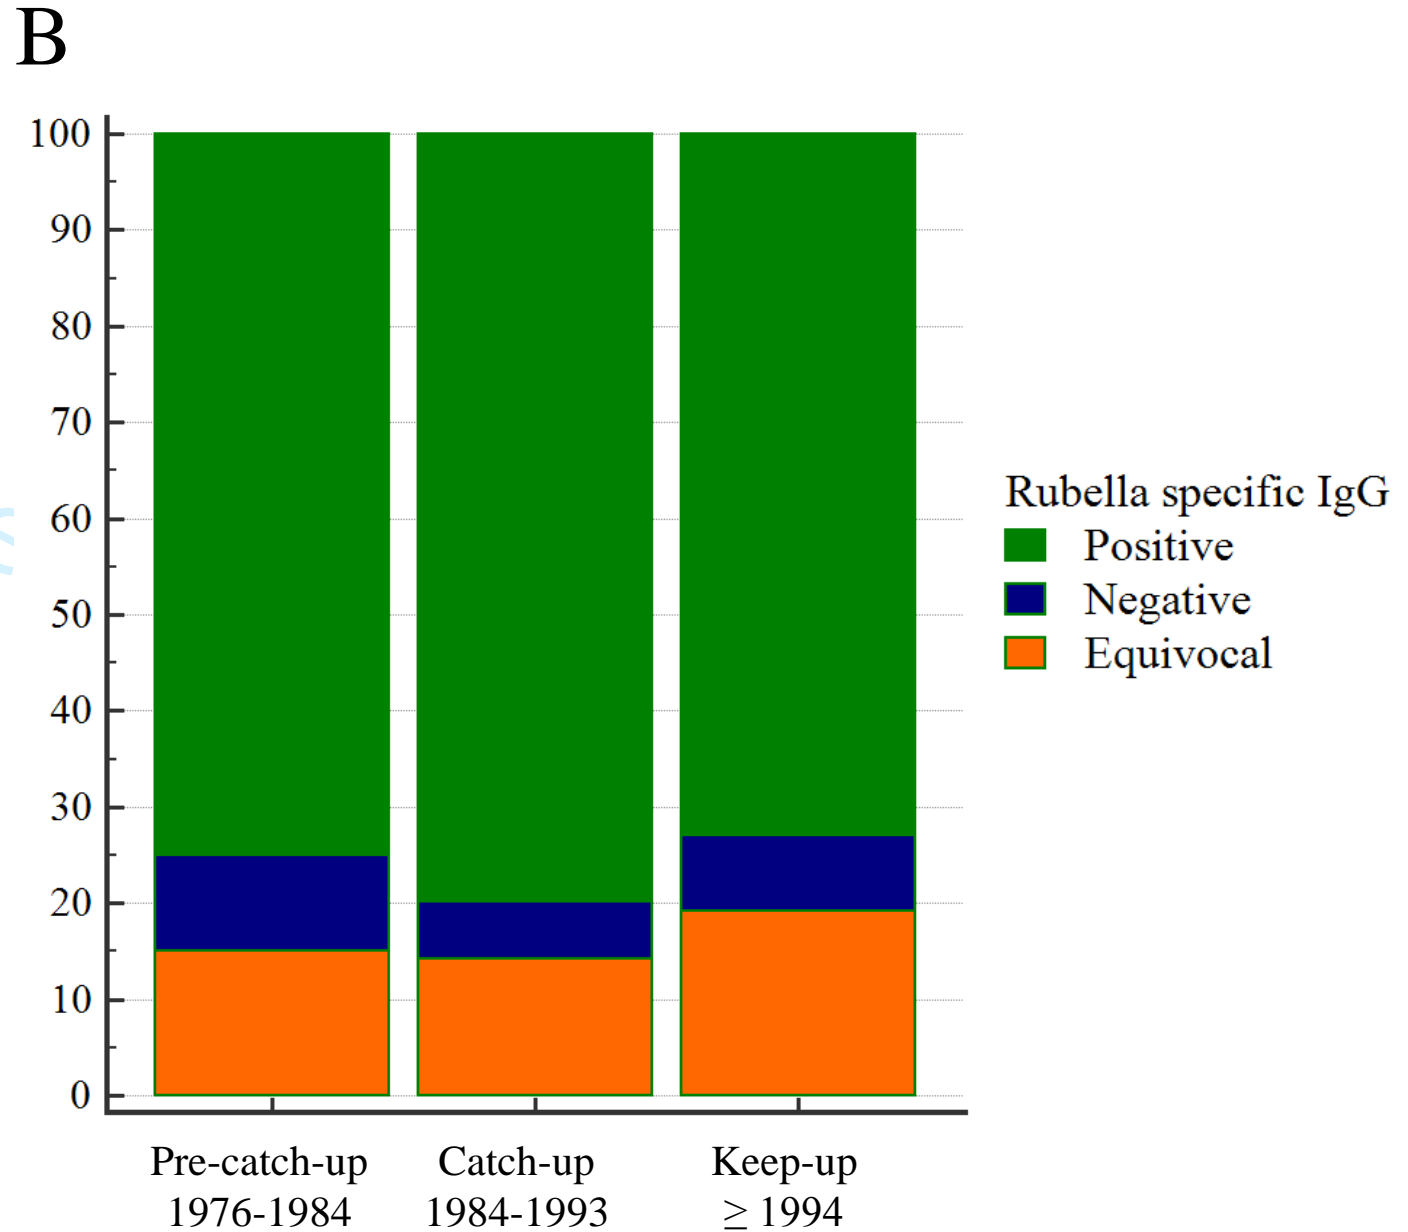

1  
2  
3  
4 **Supplementary Figure Legends**  
5

6  
7  
8 **Supplementary Figure S1** Test results of rubella-specific IgG antibody (A) by age group and (B) by birth  
9 cohort based on nationwide immunization programs.  
10  
11  
12  
13  
14  
15  
16  
17  
18  
19  
20  
21  
22  
23  
24  
25  
26  
27  
28  
29  
30  
31  
32  
33  
34  
35  
36  
37  
38  
39  
40  
41  
42  
43  
44  
45  
46  
47  
48  
49  
50  
51  
52  
53  
54  
55  
56  
57  
58  
59  
60

For peer review only

STROBE 2007 (v4) Statement—Checklist of items that should be included in reports of *cross-sectional studies*

| Section/Topic                | Item # | Recommendation                                                                                                                                                                       | Reported on page # |
|------------------------------|--------|--------------------------------------------------------------------------------------------------------------------------------------------------------------------------------------|--------------------|
| Title and abstract           | 1      | (a) Indicate the study's design with a commonly used term in the title or the abstract                                                                                               | 1-2                |
|                              |        | (b) Provide in the abstract an informative and balanced summary of what was done and what was found                                                                                  | 2                  |
| Introduction                 |        |                                                                                                                                                                                      |                    |
| Background/rationale         | 2      | Explain the scientific background and rationale for the investigation being reported                                                                                                 | 4-5                |
| Objectives                   | 3      | State specific objectives, including any prespecified hypotheses                                                                                                                     | 4-5                |
| Methods                      |        |                                                                                                                                                                                      |                    |
| Study design                 | 4      | Present key elements of study design early in the paper                                                                                                                              | 5-6                |
| Setting                      | 5      | Describe the setting, locations, and relevant dates, including periods of recruitment, exposure, follow-up, and data collection                                                      | 5-6                |
| Participants                 | 6      | (a) Give the eligibility criteria, and the sources and methods of selection of participants                                                                                          | 5-6                |
| Variables                    | 7      | Clearly define all outcomes, exposures, predictors, potential confounders, and effect modifiers. Give diagnostic criteria, if applicable                                             | 6                  |
| Data sources/<br>measurement | 8*     | For each variable of interest, give sources of data and details of methods of assessment (measurement). Describe comparability of assessment methods if there is more than one group | 6                  |
| Bias                         | 9      | Describe any efforts to address potential sources of bias                                                                                                                            | 5                  |
| Study size                   | 10     | Explain how the study size was arrived at                                                                                                                                            | 5-6                |
| Quantitative variables       | 11     | Explain how quantitative variables were handled in the analyses. If applicable, describe which groupings were chosen and why                                                         | 5-6                |
| Statistical methods          | 12     | (a) Describe all statistical methods, including those used to control for confounding                                                                                                | 6                  |
|                              |        | (b) Describe any methods used to examine subgroups and interactions                                                                                                                  | 6                  |
|                              |        | (c) Explain how missing data were addressed                                                                                                                                          | 5                  |
|                              |        | (d) If applicable, describe analytical methods taking account of sampling strategy                                                                                                   | Not applicable     |
|                              |        | (e) Describe any sensitivity analyses                                                                                                                                                | Not applicable     |
| Results                      |        |                                                                                                                                                                                      |                    |

|                   |     |                                                                                                                                                                                                              |                |
|-------------------|-----|--------------------------------------------------------------------------------------------------------------------------------------------------------------------------------------------------------------|----------------|
| Participants      | 13* | (a) Report numbers of individuals at each stage of study—eg numbers potentially eligible, examined for eligibility, confirmed eligible, included in the study, completing follow-up, and analysed            | 7              |
|                   |     | (b) Give reasons for non-participation at each stage                                                                                                                                                         | Not applicable |
|                   |     | (c) Consider use of a flow diagram                                                                                                                                                                           | Not applicable |
| Descriptive data  | 14* | (a) Give characteristics of study participants (eg demographic, clinical, social) and information on exposures and potential confounders                                                                     | 7              |
|                   |     | (b) Indicate number of participants with missing data for each variable of interest                                                                                                                          | 7              |
| Outcome data      | 15* | Report numbers of outcome events or summary measures                                                                                                                                                         | 7              |
| Main results      | 16  | (a) Give unadjusted estimates and, if applicable, confounder-adjusted estimates and their precision (eg, 95% confidence interval). Make clear which confounders were adjusted for and why they were included | 7              |
|                   |     | (b) Report category boundaries when continuous variables were categorized                                                                                                                                    | 6-7            |
|                   |     | (c) If relevant, consider translating estimates of relative risk into absolute risk for a meaningful time period                                                                                             | 7              |
| Other analyses    | 17  | Report other analyses done—eg analyses of subgroups and interactions, and sensitivity analyses                                                                                                               | 7              |
| Discussion        |     |                                                                                                                                                                                                              |                |
| Key results       | 18  | Summarise key results with reference to study objectives                                                                                                                                                     | 8              |
| Limitations       | 19  | Discuss limitations of the study, taking into account sources of potential bias or imprecision. Discuss both direction and magnitude of any potential bias                                                   | 9-10           |
| Interpretation    | 20  | Give a cautious overall interpretation of results considering objectives, limitations, multiplicity of analyses, results from similar studies, and other relevant evidence                                   | 8-10           |
| Generalisability  | 21  | Discuss the generalisability (external validity) of the study results                                                                                                                                        | 10             |
| Other information |     |                                                                                                                                                                                                              |                |
| Funding           | 22  | Give the source of funding and the role of the funders for the present study and, if applicable, for the original study on which the present article is based                                                | 3              |

\*Give information separately for cases and controls in case-control studies and, if applicable, for exposed and unexposed groups in cohort and cross-sectional studies.

Note: An Explanation and Elaboration article discusses each checklist item and gives methodological background and published examples of transparent reporting. The STROBE checklist is best used in conjunction with this article (freely available on the Web sites of PLoS Medicine at <http://www.plosmedicine.org/>, Annals of Internal Medicine at <http://www.annals.org/>, and Epidemiology at <http://www.epidem.com/>). Information on the STROBE Initiative is available at [www.strobe-statement.org](http://www.strobe-statement.org).

# BMJ Open

## Recent trends in seroprevalence of rubella in Korean women of childbearing age: a cross-sectional study

|                                 |                                                                                                                                                                                                                                                                                                                                                                                                                                                                                                                                                                                                                                                                                    |
|---------------------------------|------------------------------------------------------------------------------------------------------------------------------------------------------------------------------------------------------------------------------------------------------------------------------------------------------------------------------------------------------------------------------------------------------------------------------------------------------------------------------------------------------------------------------------------------------------------------------------------------------------------------------------------------------------------------------------|
| Journal:                        | <i>BMJ Open</i>                                                                                                                                                                                                                                                                                                                                                                                                                                                                                                                                                                                                                                                                    |
| Manuscript ID                   | bmjopen-2019-030873.R1                                                                                                                                                                                                                                                                                                                                                                                                                                                                                                                                                                                                                                                             |
| Article Type:                   | Original research                                                                                                                                                                                                                                                                                                                                                                                                                                                                                                                                                                                                                                                                  |
| Date Submitted by the Author:   | 01-Aug-2019                                                                                                                                                                                                                                                                                                                                                                                                                                                                                                                                                                                                                                                                        |
| Complete List of Authors:       | Choi, Rihwa; Green Cross Corp, Laboratory Medicine, Green Cross Laboratories; Sung Kyun Kwan University School of Medicine at Samsung Medical Center Cancer Center, Department of Laboratory Medicine and Genetics<br>Oh, Yejin; Green Cross Corp, Department of Laboratory Medicine, Green Cross Laboratories<br>Oh, Youngju; Green Cross Corp, Department of Laboratory Medicine, Green Cross Laboratories<br>Kim, Sung Ho; Green Cross Corp, Department of Laboratory Medicine, Green Cross Laboratories<br>Lee, Sang Gon; Green Cross Corp, Department of Laboratory Medicine, Green Cross Laboratories<br>Lee, Eun Hee; Green Cross Corp, President, Green Cross Laboratories |
| <b>Primary Subject Heading</b>: | Infectious diseases                                                                                                                                                                                                                                                                                                                                                                                                                                                                                                                                                                                                                                                                |
| Secondary Subject Heading:      | Epidemiology                                                                                                                                                                                                                                                                                                                                                                                                                                                                                                                                                                                                                                                                       |
| Keywords:                       | rubella, seroprevalence, immunization, vaccination                                                                                                                                                                                                                                                                                                                                                                                                                                                                                                                                                                                                                                 |
|                                 |                                                                                                                                                                                                                                                                                                                                                                                                                                                                                                                                                                                                                                                                                    |

SCHOLARONE™  
Manuscripts



1  
2  
3  
4 1 **Recent trends in seroprevalence of rubella in Korean women of childbearing age: a cross-sectional study**  
5  
6

7 2

8  
9 3 Running title: Rubella seroprevalence in Korean women  
10  
11

12 4

13  
14  
15 5 **Rihwa Choi <sup>1,2</sup>, Yejin Oh <sup>1</sup>, Youngju Oh <sup>1</sup>, Sung Ho Kim <sup>1</sup>, Sang Gon Lee <sup>1,\*</sup>, and Eun Hee Lee <sup>1,\*</sup>**  
16  
17

18 6 <sup>1</sup> Department of Laboratory Medicine, Green Cross Laboratories, Yongin, Gyeonggi, Republic of Korea  
19

20 7 <sup>2</sup> Department of Laboratory Medicine and Genetics, Samsung Medical Center, Sungkyunkwan University  
21  
22 8 School of Medicine, Seoul, Republic of Korea  
23  
24

25 9

26  
27  
28 10 \*Co-corresponding authors: Sang Gon Lee, M.D.  
29

30  
31 11 Department of Laboratory Medicine, Green Cross Laboratories, 107, Ihyeonro 30 beon-gil, Giheng-gu, Yongin-  
32  
33 12 Si, Gyeonggi-do, Republic of Korea  
34

35 13 Tel; +82-31-260-9209, fax; +82-31-260-0964, e-mail; sglee@gclabs.co.kr  
36  
37

38 14

39  
40  
41 15 \*Co-corresponding authors **Eun Hee Lee**, M.D., Ph.D.  
42

43  
44 16 Department of Laboratory Medicine, Green Cross Laboratories, 107, Ihyeonro 30 beon-gil, Giheng-gu, Yongin-  
45  
46 17 Si, Gyeonggi-do, Republic of Korea  
47

48 18 Tel; +82-1566-0131, fax; +82-31-260-0964, e-mail; ehlee@gclabs.co.kr  
49  
50  
51  
52  
53  
54  
55  
56  
57  
58  
59  
60

1  
2  
3  
4 19 **Abstract**

5  
6  
7 20 **Objectives:** The aim of this study was to investigate the immunity against rubella using the serologic status of  
8  
9 21 rubella-specific IgG antibodies (anti-rubella IgG) in Korean women of childbearing age (15-49 years).

10  
11 22 **Design:** Retrospective cross-sectional study.

12  
13  
14 23 **Setting:** Population-based cross-sectional study in South Korea.

15  
16  
17 24 **Participants:** Between January 2010 and December 2017, test results from Korean women age 15-49 years who  
18  
19 25 had visited an obstetric private clinic (nationwide institutions) and had requested rubella-specific IgG antibody  
20  
21 26 tests from Green Cross Laboratories were obtained from the laboratory information system.

22  
23  
24 27 **Results:** Between 2010 and 2017, anti-rubella IgG test results from 328,426 Korean women aged 15-49 years  
25  
26 28 who had visited private obstetric clinics (1,438 institutions nationwide) were retrospectively analysed by tested  
27  
28 29 year, age, cohort, and geographic regions. Over the 8-year study period, the rate of unimmunized women ranged  
29  
30 30 from 7.8-9.7%. Multivariable-adjusted logistic regression models showed that the odds of being immune to  
31  
32 31 rubella (positive and equivocal results of anti-rubella IgG test) were lower in 2017 compared to 2010, in women  
33  
34 32 in their 40s, in a pre-catch up cohort, and in women living in Incheon, Busan, South Gyeongsang, North and  
35  
36 33 South Jeolla, and Jeju provinces ( $p < 0.0001$ ).

37  
38 34 **Conclusions:** In consideration of the factors associated with prevalence of women unimmunized to rubella,  
39  
40 35 future public health efforts should be focused on catch-up activities. The results of this study could be used to  
41  
42 36 strengthen disease control and prevent rubella, including a nationwide immunization program.

43  
44  
45  
46  
47  
48  
49  
50  
51  
52  
53  
54  
55  
56  
57  
58  
59  
60

### 37 **Strengths and limitations of this study**

38

39 ► The main strength of the study, lies in its sample size, due to the fact that it is a nationwide study with one of  
40 the broadest samples to date in South Korea.

41 ► The study provided a recent information of the seroprevalence of anti-rubella IgG that have not been  
42 available at this scale before.

43 ► The huge sample size of this study allowed for precise information of the age related seroprevalence of anti-  
44 rubella IgG and this study provides valuable information for establishing a catch-up vaccination program in South  
45 Korea.

46 ► One limitation of this study was the lack of detailed clinical information, however, seroprevalence studies are  
47 an essential tool to monitor the efficacy of vaccination programmes, to understand population immunity and to  
48 identify populations at higher risk of infection.

49

### 50 **Funding**

51 This work was supported by Abbott Diagnostics Korea. The sponsor had no involvement in the study design, data  
52 interpretation, or writing of the manuscript. The authors have no other relevant financial interest in the products  
53 or companies described in this article.

54

### 55 **Competing interests**

56 None declared.

## 57 Introduction

58 Rubella disease is caused by rubella virus (belonging to the family Togaviridae and the only member of the  
59 genus *Rubivirus*).<sup>1</sup> Although most cases of infection lead to a mild, self-limiting measles-like disease, the real  
60 threat arises when rubella virus infects the fetus, particularly during the first trimester when infection can lead to  
61 miscarriage or congenital rubella syndrome.<sup>1</sup> Worldwide, over 100,000 babies are born with congenital rubella  
62 syndrome every year, and the World Health Organization (WHO) recommends that all countries that have not  
63 yet introduced a rubella vaccine should consider doing so using existing, well-established measles immunization  
64 programs.<sup>2</sup> The WHO Strategic Advisory Group of Experts on Immunization (SAGE) recommends an increased  
65 focus on improving national immunization systems in general to better control rubella.<sup>2</sup> Under the Global  
66 Vaccine Action Plan 2011–2020, rubella is targeted for elimination in five WHO Regions by 2020.<sup>3,4</sup> As has  
67 been reported in Europe, suboptimal coverage levels in childhood (<95%) can lead to a prolonged inter-  
68 epidemic period and to a paradoxical shift of disease incidence towards older age groups, including women of  
69 childbearing age, with a consequent increase of congenital rubella syndrome.<sup>5</sup> Serosurveys may represent an  
70 effective instrument to measure infection- and vaccine-induced immunity in a specific population, and  
71 serosurveys can effectively support strategies aimed at eliminating the disease.<sup>5</sup>

72 The incidence of rubella infection in South Korea was 107 cases in 2000 that decreased to 7 cases in  
73 2017, corresponding to incidence rates below 0.1 per 100,000 persons according to the Infectious Diseases  
74 Surveillance Yearbook, 2017.<sup>6</sup> Although the exact number of cases for congenital rubella syndrome was not  
75 available for the surveillance book, 17 cases in 2010 of congenital rubella syndrome were reported, which using  
76 the Korean Classification of Disease code P350 for congenital rubella syndrome on the Healthcare Bigdata Hub  
77 by the Health Insurance Review and Assessment Service (HIRA).<sup>7</sup> According to the reported measles and  
78 rubella cases and incidence rates by WHO member states, 0-3,947 confirmed rubella cases corresponding to  
79 incidence rates of 0-11.54 per 1,000,000 total population were reported in 2018 in the western pacific region.<sup>8</sup>

80 In Korea, a rubella vaccination program using the measles, mumps in rubella (MMR) vaccine has  
81 been included in the national immunization program since 1985 for disease control and prevention.<sup>9</sup> A second  
82 MMR vaccine dose was introduced in 1997, and a catch-up measles-rubella vaccine for school-aged children  
83 was introduced in 2001.<sup>9</sup> In 2002, a two-dose MMR keep-up program through the verification of vaccination  
84 history was introduced at elementary schools (6-7 years).<sup>9</sup> A new vaccination policy was formed by the 2012

1  
2  
3  
4 85 Military Healthcare Service, and since then, MMR vaccines have been routinely administered to all new recruits  
5  
6 86 early in basic training.<sup>10</sup> The national guidelines in Korea regarding ascertainment of rubella immunity are based  
7  
8 87 on laboratory evidence for rubella antibodies and the Korea Centers for Disease Control and Prevention  
9  
10 88 recommends that women of childbearing age whose anti-rubella specific IgG is negative should receive 1 dose  
11  
12 89 of the MMR vaccine although they did have histories of rubella vaccination (total numbers of vaccination in one  
13  
14 90 individual should be  $\leq 3$ ).<sup>11</sup>

15  
16 91 Although there have been several studies on rubella in Korea, most of the studies have only been  
17  
18 92 focused on surveillance of newly identified cases, seroprevalences of rubella IgG in children, or had been  
19  
20 93 conducted in the early 1990s.<sup>9 10 12-16</sup> Although a recent meta-analysis assessing global seroprevalence of rubella  
21  
22 94 among pregnant and childbearing age women, no data from Korean populations were included in the study.<sup>5</sup> In a  
23  
24 95 recent 16-year review of seroprevalence studies on rubella, only one Korean study on children and adolescents  
25  
26 96 was included.<sup>3</sup> To our knowledge, no recent data have been collected on rubella immunization status with  
27  
28 97 rubella-specific IgG antibodies in Korean women of childbearing age in a large study population, which could  
29  
30 98 provide basic knowledge on nationwide immunization strategies. Green Cross Laboratories is one of the largest  
31  
32 99 referral clinical laboratories throughout South Korea that has its own bio-logistics and provides clinical  
33  
34 100 specimen analysis services including rubella-specific IgG antibody tests to nationwide clinics and hospitals.  
35  
36 101 According to the provider data on the National Health Insurance Statistical Yearbook 2017 published by HIRA  
37  
38 102 in South Korea, 1,319 private obstetric clinics and 1,433 hospitals with or without obstetric clinics are providing  
39  
40 103 health services.<sup>17</sup> Among a total of 91,545 health care providing institutions (public and private), 4.1% (3,746  
41  
42 104 institutions) were public or national provider institutions.<sup>17</sup> According to the review records of delivery by  
43  
44 105 provider type in the same book, 89.9% (523/582) of delivery institutions nationwide were private obstetric  
45  
46 106 clinics and hospitals.<sup>17</sup> Among the 358,285 deliveries carried out in 2017, 93.5% (335,119) were delivered in  
47  
48 107 private obstetric clinics and hospitals.<sup>17</sup>

49  
50 108 Therefore, in this study, we aimed to investigate the immunity against rubella and to share baseline  
51  
52 109 data for future immunization policies in South Korea. The aim of this study was to investigate the epidemiology  
53  
54 110 of rubella immunization status using serologic assays for rubella-specific IgG antibodies in Korean women of  
55  
56 111 childbearing age. In addition, we assessed rubella immunization status according to year and age group.

57  
58 112  
59  
60

## 113 **Materials and Methods**

114

115 Participants' involvement and data collection

116 No patients were involved in the development of the research question or the outcome measures, nor were they  
117 involved in developing plans for design or implementation of the study. No patients were asked for advice  
118 regarding the interpretation or writing of results. There are no plans to disseminate the study results to the  
119 relevant patient community.

120

121 Study populations

122 Between January 2010 and December 2017, test results from Korean women age 15-49 years who had visited an  
123 obstetric private clinics and hospitals (nationwide institutions) and had requested rubella-specific IgG antibody  
124 tests from Green Cross Laboratories were obtained from the laboratory information system. Missing data for  
125 age, sex, and geographic regions were excluded. Test results from women whose tests were duplicated were  
126 excluded. All data were anonymized before being transferred to analysis for age-, year-, birth cohort, and  
127 geographical region-specific anti-rubella IgG seroprevalences. This study was conducted according to  
128 guidelines in the Declaration of Helsinki, and all procedures involving human subjects were approved by the  
129 Institutional Review Board of Green Cross Laboratories (GCL 2017-1010-02).

130

131 Data collection

132 Annual incidence of rubella infection in South Korea was obtained from reported cases in the Infectious  
133 Diseases Surveillance Yearbook, 2017 by the Korea Centers for Disease Control and Prevention.<sup>6</sup> Data for the  
134 incidence of congenital rubella syndrome was obtained from the Healthcare Bigdata Hub by HIRA using  
135 Korean Classification of Disease code P350 in South Korea.<sup>7</sup>

136

137 Analytical procedures

1  
2  
3  
4 138 All serum samples were tested for anti-rubella IgG using a chemiluminescent microparticle immunoassay  
5  
6 139 (CMIA, Architect i2000SR, Abbott Diagnostics, Abbott Park, IL, USA) according to the manufacturer's  
7  
8 140 instructions. For the rubella IgG assay, the presence of  $\geq 10$  IU/mL was defined as 'positive'. Antibody levels of  
9  
10 141 0.0–4.9 IU/mL were defined as 'negative,' and antibody levels between 5.0–9.9 IU/mL were defined as  
11  
12 142 'equivocal.' During the eight-year study period, the laboratory protocol was maintained without any changes  
13  
14 143 and all tests requested for anti-rubella specific IgG were analysed automatically and tested once without re-test.

144

#### 145 Definition

146 Positive rubella-specific IgG results are indicative of past exposure to rubella virus or being vaccinated.<sup>18</sup>  
147 Women who had 'negative' results were defined as 'unimmunized'. Women were classified as 'immune' if their  
148 anti-rubella IgG was positive or showed equivocal results.<sup>18</sup> Birth cohorts were defined based on the vaccination  
149 program: pre-catch-up, 1976-1984; catch-up, 1985-1993; and keep-up,  $\geq 1994$ .<sup>9</sup> The pre-catchup (1976-1984)  
150 cohort was women who had presumptively limited MMR vaccination coverage with only one dose provided by  
151 the public program. The catch-up (1985-1993) cohort was woman who had limited MMR vaccination coverage,  
152 but were given the measles-rubella (MR) vaccine during the 2001 catch-up campaign.<sup>9</sup> The keep-up ( $\geq 1994$ )  
153 cohort was women who were candidates for the keep-up program.<sup>9</sup>

154

#### 155 Statistical analysis

156 Categorical variables are presented as frequencies and percentages. The chi-squared test was used to compare  
157 categorical variables. The Cochran-Armitage test for trend was performed to evaluate the seroprevalence of anti-  
158 rubella IgG by year and cohort. Multivariable-adjusted logistic regression models were used to estimate the odds  
159 ratio (OR) of being immune to rubella based on the results of the anti-rubella IgG seroprevalence test for the  
160 tested years, age, birth cohort, and geographic region in South Korea. Variables with univariate *p*-values less  
161 than 0.05 were included as adjusted variables for the multivariable analysis. Statistical analysis was executed  
162 using MedCalc Statistical Software version 18.5 (MedCalc Software bvba, Ostend, Belgium). *P*-values were  
163 considered significant at the 0.05 level.

164

## 165 **Results**

166

### 167 General characteristics of the study population

168 Between January 2010 and December 2017, anti-rubella IgG test results from 328,426 Korean women age 15-49  
169 years who had visited obstetric private clinics (from 1,438 institutions nationwide) and had requested rubella-  
170 specific IgG antibody tests from Green Cross Laboratories were obtained from the laboratory information  
171 system and included in the study. The numbers for anti-rubella IgG results for the study subjects by each year  
172 and age group are summarized in Table 1.

173

### 174 Rubella immunity in Korean women of childbearing age

175 The overall proportion of IgG-negative women who were defined as ‘unimmunized’ was 8.6%, and the overall  
176 proportion of IgG-equivocal women was 15.0% and IgG-positive women was 76.4%. Rubella-specific IgG  
177 antibody test results with an annual incidence of rubella infection and congenital rubella syndrome from  
178 surveillance data by year are summarized in Figure 1. There were significant differences in the rate of  
179 unimmunized women during the 8-year study period ( $p < 0.05$ ), although there was no significant trend ( $p$   
180  $> 0.05$ ). There was a decrease in the rate of women who had positive rubella-specific IgG antibody results (from  
181 81.0% in 2010 to 73.0% in 2017,  $p < 0.05$ ), and an increase in the rate of women who had ‘equivocal’ results  
182 from 2010 to 2017 (11.0% in 2010 to 17.6% in 2017,  $p < 0.05$ , Figure 1). There were significant differences in  
183 the rate of unimmunized women among different age groups, cohorts, and geographic regions ( $p < 0.05$ ). For  
184 example, less than 1,000 women had been tested for anti-rubella IgG in the Gangwon province and Ulsan.

185 Multivariable-adjusted logistic regression models showed that the odds of being immune to rubella  
186 (positive and equivocal results of anti-rubella IgG tests) were decreased in 2017 compared to 2010 (OR 0.63,  
187 95% confidence interval, [CI] 0.60–0.67,  $p < 0.0001$ ) and women in their 40s (OR 0.85, 95% CI, 0.79–0.90,  $p <$   
188 0.0001, Table 2). Among different cohorts, catch-up (being born in 1985–1993) and keep-up (born  $\geq 1994$ )  
189 cohorts had higher ORs for being immune to rubella compared with pre-catch up cohorts (born in 1976–1984,  $p$   
190  $< 0.0001$ ). Among different geographic regions, women living in Incheon, Busan, South Gyeongsang, North and  
191 South Jeolla, and Jeju provinces had lower ORs and women living in Sejong city and Daejeon had higher ORs



192 for being immune to rubella in comparison with women living in Seoul ( $p < 0.0001$ ).

193

## 194 **Discussion**

195 In this study, we investigated the seroprevalence of rubella in Korean women of childbearing age within the past  
196 8 years. The strength of this study was the large study population over a long study period (8 years) and the  
197 novelty of the study population (Korean women of childbearing age were assessed for the first time in Korea).  
198 Because previous studies focused on the different measurement methods and immunization status, this  
199 suggested that equivocal results might be due to being immune to rubella infection,<sup>18 19</sup> thus, the authors  
200 focused on and analysed factors associated with those whose anti-rubella IgG results were negative.

201 Understanding the spread of infectious diseases and designing optimal control strategies is a major  
202 goal of public health.<sup>20 21</sup> In the present study, the seronegativity prevalence was 8.6% in Korean women of  
203 childbearing age. A recent 16-year review of seroprevalence studies on rubella assessing 97 articles between  
204 January 1998 and June 2014 had reported that seroprevalence ranged from 53.0% to 99.3% for rubella studies.<sup>3</sup>  
205 A recent meta-analysis of rubella among pregnant and childbearing age women had reported that approximately  
206 88% of the studies conducted on pregnant women had reported a seronegativity rate  $>5\%$ , and the pooled  
207 rubella seronegativity prevalence was 9.3%.<sup>5</sup> The study had reported that global seronegativity prevalence was  
208 of concern, considering that WHO set the rubella susceptibility threshold at 5% for women of childbearing age.  
209 Previous studies that had been included in the meta-analysis had used more than 1,000 subjects and had been  
210 published within the past 10 years are summarized in Table 3.

211 The seroprevalence of rubella in Korean populations was assessed previously in infants, children, and  
212 adolescents.<sup>12-16</sup> One study on 5,393 students from 8 elementary schools in the Gyeonggi province, Korea in  
213 1993, 1996, and 1996 had reported that the age-adjusted rubella susceptibility rate was 22.9%.<sup>14</sup> Another study  
214 performed during the same study period had reported that rubella antibody loss rates were 14.3-15.8% in Korean  
215 children.<sup>12</sup> In a 2005 population-based survey in Nonsan, Korea, age-appropriate immunization among urban-  
216 rural children aged 24-35 months had reported that the age-appropriate MMR immunization rate was 61.1%-  
217 97.4%.<sup>16</sup> A recent study conducted between September 2009 and December 2010 assessing seroprevalence of  
218 rubella in 295 infants and 80 of their mothers had reported that seropositive rates were 22.4% in infants and  
219 98.8% in mothers (79/80).<sup>13</sup> In that study, because none of the infants had a history of MMR vaccination,

220 natural infection, or contact with an infected person, it was assumed that specific antibodies were passed from  
221 their mothers to their infants.<sup>13</sup> Moreover, among the 80 mothers, 55 (68.8%) had experienced either  
222 immunization or past rubella infection.<sup>13</sup>

223 The historical immunization coverage in pre-school children right before admission to elementary  
224 school, which was evaluated based on a telephone survey, reported 99.5% in 2001 and 97.3% of school-aged  
225 children (catch-up cohort) were vaccinated with the MR vaccine.<sup>22</sup> According to the Infectious Disease  
226 Surveillance Yearbook 2017, published by the Korean Ministry of Health and Welfare and the Korean Centers  
227 for Disease Control and Prevention, the incidence rate of rubella from 2001–2017 decreased (from 0.17 per  
228 100,000 population in 2001 to 0.01 per 100,000 population in 2017).<sup>6</sup> In this study, ORs for being immune to  
229 rubella infection were higher in the catch-up (born 1985–1993) and keep-up (born  $\geq$  1994) cohorts than in pre-  
230 catch up cohorts (born 1976–1984) which suggests that catch-up and keep-up immunization was effective.<sup>22</sup> The  
231 vaccine coverage rate was maintained at  $> 95\%$  from 2010 to 2017 in South Korea (ranges 97.0% in 2012 to  
232 99.8% in 2010).<sup>22</sup> No rubella outbreak had been reported in South Korea over 8 years (2010–2017) according to  
233 the Infectious Disease Surveillance Yearbook. Among the different age groups, older women were more likely  
234 to have negative IgG results and no protection from rubella infection. Women in their 30s had the lowest rate of  
235 IgG+ results in this study. According to recent data from Korean Statistical Information (KOSIS), the average  
236 maternal age at delivery for Korean women was 32.4 years in 2016. Because of this, public health efforts should  
237 be focused on catch-up activities. The results of this study could be used as basic knowledge to support  
238 strengthening disease control and prevention of rubella, including a nationwide immunization program.

239 In South Korea, national guidelines in force to control and prevention measles and rubella include  
240 national immunization program and active disease surveillance system.<sup>2 4 22</sup> MMR vaccination has been covered  
241 by national health insurance that provides free of charge immunization to all children aged  $\leq 12$  years and  
242 clinical laboratory screening for rubella immunization status using anti-rubella specific IgG tests in pregnant  
243 women has been covered by the national health insurance free of charge for women visiting obstetrics clinics.<sup>17</sup>  
244 Susceptible woman of childbearing age is indeed a priority, and public health efforts should be focused on  
245 catch-up activities in order to reduce the rate of susceptible young adults, especially for all women of  
246 childbearing age.<sup>23</sup> Gynecologists and general practitioners should be encouraged to propose rubella screening  
247 for women of childbearing age before they become pregnant to identify those women who lack rubella  
248 antibodies, whether acquired as the result of vaccination or a natural infection.<sup>23</sup> Finally, active surveillance

1  
2  
3  
4 249 from laboratories that perform rubella immunity testing should be planned; laboratories should notify the Public  
5  
6 250 Health Authority about every woman of childbearing age with a negative test, and the Public Health Authority  
7  
8 251 should engage these women to promote immunization against rubella.<sup>23</sup> Serological surveillance is an important  
9  
10 252 tool for the evaluation of vaccination programs and avoids the limitations of passive disease reporting systems;  
11  
12 253 this is one of the entry points for congenital rubella syndrome surveillance, where gaps limit the ability to  
13  
14 254 monitor progress towards its elimination.<sup>23</sup>

15  
16 255 In this study, women living in Sejong city were the most protected from rubella infection. In early  
17  
18 256 2007, the South Korean government had created a special administrative district from parts of the South  
19  
20 257 Chungcheong and North Chungcheong provinces, near Daejeon, to relocate nine ministries and four national  
21  
22 258 agencies from Seoul. Various government programs for encouraging more births, such as incentives, in different  
23  
24 259 regions may have affected the results.<sup>4</sup> In this study, less than 1,000 women had been tested for anti-rubella IgG  
25  
26 260 in the Gangwon province and Ulsan. This may affect the percent seropositivity of anti-rubella IgG in the present  
27  
28 261 study. Future studies are needed to define the effect of regional differences of government strategies on rubella  
29  
30 262 seroprevalences.

31  
32 263 One limitation of this study was the lack of clinical information, such as vaccination history or contact  
33  
34 264 history with rubella-infected individuals. The results of this study were prone to ascertainment bias because the  
35  
36 265 study population was based on mostly private obstetric clinics, thus results might be different from those  
37  
38 266 obtained from individuals using national or public health care providing institutions, although the use of a  
39  
40 267 population-based study minimized selection bias.<sup>24</sup> Because the exact proportions of pregnant women in Korea  
41  
42 268 who utilized public health facilities to test for anti-rubella IgG, and their socio-demographics as well as rubella  
43  
44 269 vaccine coverage among the population seeking health care from private and public sectors and the proportion  
45  
46 270 of pregnant women as well as the general population seeking care from the private sector across provinces were  
47  
48 271 not available, future studies to evaluate those factors associated with rubella control and prevention are needed.  
49  
50 272 However, we do not yet understand what surrogate markers, other than antibodies, show longer-term cell-  
51  
52 273 mediated immunity and protection from disease.<sup>1</sup> Seroprevalence studies are an essential tool to monitor the  
53  
54 274 efficacy of vaccination programmes, to understand population immunity and to identify populations at higher  
55  
56 275 risk of infection.<sup>25</sup> This study is a cross-sectional study and merely descriptive analyses were adopted in this  
57  
58 276 study. The results of this study were prone to ascertainment bias. The present study did not include men, women  
59  
60 277 with older ages, or foreigners living in South Korea. Therefore, the findings are not generalisable to these

278 groups. A systems-level approach to understanding the development and maintenance of acute and long-term  
279 immunity to rubella and a rubella-containing vaccine is needed.<sup>1</sup>

280

## 281 **Conclusions**

282 In conclusion, this study investigated immunization status of rubella among Korean women of childbearing age.  
283 Considering the immunization status by age group and the increased prevalence of women with equivocal  
284 results, future public health efforts should be focused on catch-up activities. The results of this study could be  
285 used as foundational knowledge for strengthening disease control and prevention of rubella, including a  
286 nationwide immunization program.

287

## 288 **Contributors**

289 All authors contributed to manuscript preparation; Rihwa Choi and Sang Gon Lee, conception, design, statistical  
290 analyses and interpretation of the data; Rihwa Choi, Youngju Oh, Sung Ho Kim, and Sang Gon Lee, data  
291 acquisition; Rihwa Choi, article drafting; Rihwa Choi, Sang Gon Lee, and Eun Hee Lee, critical article revision  
292 for important intellectual content; Sang Gon Lee and Eun Hee Lee, obtaining funding; Rihwa Choi, Yejin Oh,  
293 Youngju Oh, and Sung Ho Kim, administrative and technical support; Rihwa Choi, Youngju Oh, and Sung Ho  
294 Kim, collection and assembly of data. All authors read and approved the final manuscript.

295

## 296 **Patient consent for publication**

297 Not required.

298

## 299 **Ethics approval**

300 This study was approved by the Institutional Review Board of Green Cross Laboratories (GCL 2017-1010-02).

301

1  
2  
3  
4  
5  
6  
7  
8  
9  
10  
11  
12  
13  
14  
15  
16  
17  
18  
19  
20  
21  
22  
23  
24  
25  
26  
27  
28  
29  
30  
31  
32  
33  
34  
35  
36  
37  
38  
39  
40  
41  
42  
43  
44  
45  
46  
47  
48  
49  
50  
51  
52  
53  
54  
55  
56  
57  
58  
59  
60

302 **Data sharing statement**

303 The datasets generated and/or analysed during the current study are not publicly available due to individual  
304 privacy regulations, but are available from the corresponding author on reasonable request.

For peer review only

305 **References**

- 306 1. Lambert N, Strebel P, Orenstein W, et al. Rubella. *Lancet (London, England)* 2015;385(9984):2297-307. doi:  
307 10.1016/s0140-6736(14)60539-0 [published Online First: 2015/01/13]
- 308 2. WHO Fact sheet for Rubella 2017. available at <https://www.who.int/en/news-room/fact-sheets/detail/rubella>,  
309 Jan 2019.
- 310 3. Dimech W, Mulders MN. A 16-year review of seroprevalence studies on measles and rubella. *Vaccine*  
311 2016;34(35):4110-8. doi: 10.1016/j.vaccine.2016.06.002 [published Online First: 2016/06/25]
- 312 4. World Health Organization. Global Measles and Rubella Strategic plan 2012. 2012
- 313 5. Pandolfi E, Gesualdo F, Rizzo C, et al. Global seroprevalence of rubella among pregnant and childbearing  
314 age women: a meta-analysis. *European journal of public health* 2017 doi: 10.1093/eurpub/ckw259  
315 [published Online First: 2017/02/17]
- 316 6. Ministry of Health and Welfare and Korea Centers for Disease Control and Prevention. Infectious Diseases  
317 Surveillance Yearbook, 2017. 2018
- 318 7. Healthcare Bigdata Hub. Health Insurance Review and Assessment Service. *available at:*  
319 <https://opendata.hira.or.kr/home.do>
- 320 8. World Health Organization. Measles and Rubella Surveillance Data. *available at:*  
321 [https://www.who.int/immunization/monitoring\\_surveillance/burden/vpd/surveillance\\_type/active/meas](https://www.who.int/immunization/monitoring_surveillance/burden/vpd/surveillance_type/active/measles_monthlydata/en/)  
322 [les\\_monthlydata/en/](https://www.who.int/immunization/monitoring_surveillance/burden/vpd/surveillance_type/active/measles_monthlydata/en/)
- 323 9. Choe YJ, Eom HE, Cho SI. Trend of measles, mumps, and rubella incidence following the measles-rubella  
324 catch up vaccination in the Republic of Korea, 2001. *Journal of medical virology* 2017 doi:  
325 10.1002/jmv.24808 [published Online First: 2017/03/18]
- 326 10. Heo JY, Choe KW, Yoon CG, et al. Vaccination policy in Korean armed forces: current status and future  
327 challenge. *Journal of Korean medical science* 2015;30(4):353-9. doi: 10.3346/jkms.2015.30.4.353  
328 [published Online First: 2015/04/02]
- 329 11. Korea Centers for Disease Control and Prevention. Chapter XVI. Rubella. *Available at:*  
330 <https://nip.cdc.go.kr/irgd/reference.do>
- 331 12. Ki M, Kim MH, Choi BY, et al. Rubella antibody loss rates in Korean children. *Epidemiology and infection*  
332 2002;129(3):557-64. [published Online First: 2003/02/01]
- 333 13. Cho HK, Lee H, Kim HW, et al. Seroprevalences of Specific IgG Antibodies to Measles, Mumps, and

- 1  
2  
3  
4 334 Rubella in Korean Infants. *Journal of Korean medical science* 2016;31(12):1957-62. doi:  
5  
6 335 10.3346/jkms.2016.31.12.1957 [published Online First: 2016/11/09]  
7  
8 336 14. Ki MR, Choi BY, Kim MH, et al. Rubella seroprevalence in Korean children. *Journal of Korean medical*  
9  
10 337 *science* 2003;18(3):331-6. doi: 10.3346/jkms.2003.18.3.331 [published Online First: 2003/06/17]  
11  
12 338 15. Lee H, Kim HW, Cho HK, et al. Reappraisal of MMR vaccines currently used in Korea. *Pediatrics*  
13  
14 339 *international : official journal of the Japan Pediatric Society* 2011;53(3):374-80. doi: 10.1111/j.1442-  
15  
16 340 200X.2010.03244.x [published Online First: 2010/09/14]  
17  
18 341 16. Kim EY, Lee MS. Related factors of age-appropriate immunization among urban-rural children aged 24-35  
19  
20 342 months in a 2005 population-based survey in Nonsan, Korea. *Yonsei medical journal* 2011;52(1):104-  
21  
22 343 12. doi: 10.3349/ymj.2011.52.1.104 [published Online First: 2010/12/15]  
23  
24 344 17. Health Insurance Review & Assessment Service. National Health Insurance Statistical Yearbook 2017. 2018  
25  
26 345 18. Bouthry E, Furione M, Huzly D, et al. Assessing Immunity to Rubella Virus: a Plea for Standardization of  
27  
28 346 IgG (Immuno)assays. *J Clin Microbiol* 2016;54(7):1720-25. doi: 10.1128/jcm.00383-16 [published  
29  
30 347 Online First: 2016/05/06]  
31  
32 348 19. World Health Organization. Manual for the Laboratory-based Surveillance of Measles, Rubella, and  
33  
34 349 Congenital Rubella Syndrome. 2019. available at:  
35  
36 350 [https://www.who.int/immunization/monitoring\\_surveillance/burden/laboratory/manual\\_section91/en/](https://www.who.int/immunization/monitoring_surveillance/burden/laboratory/manual_section91/en/)  
37  
38 351 20. Salathe M, Jones JH. Dynamics and control of diseases in networks with community structure. *PLoS*  
39  
40 352 *computational biology* 2010;6(4):e1000736. doi: 10.1371/journal.pcbi.1000736 [published Online  
41  
42 353 First: 2010/04/14]  
43  
44 354 21. Xu Z, Zu Z, Zheng T, et al. Comparative analysis of the effectiveness of three immunization strategies in  
45  
46 355 controlling disease outbreaks in realistic social networks. *PloS one* 2014;9(5):e95911. doi:  
47  
48 356 10.1371/journal.pone.0095911 [published Online First: 2014/05/03]  
49  
50 357 22. Korea Centers for Disease Control and Prevention. 2017 Disease Control and Prevention White Paper. 2018  
51  
52 358 23. Serena GM, Filomena GM, Vittoria LA, et al. Lack of immunity against rubella among Italian young adults.  
53  
54 359 *BMC infectious diseases* 2017;17(1):199. doi: 10.1186/s12879-017-2295-y [published Online First:  
55  
56 360 2017/03/09]  
57  
58 361 24. Sedgwick P. Bias in observational study designs: cross sectional studies. *BMJ (Clinical research ed)*  
59  
60 362 2015;350:h1286. doi: 10.1136/bmj.h1286 [published Online First: 2015/03/10]  
363 25. Dimech W, Mulders MN. A review of testing used in seroprevalence studies on measles and rubella.

- 1  
2  
3  
4 364 *Vaccine* 2016;34(35):4119-22. doi: 10.1016/j.vaccine.2016.06.006 [published Online First:  
5  
6 365 2016/06/25]
- 7  
8 366 26. Schoub BD, Harris BN, McAnerney J, et al. Rubella in South Africa: an impending Greek tragedy? *South*  
9  
10 367 *African Medical Journal* 2009;99(7)
- 11  
12 368 27. Inagaki AD, Oliveira LA, Oliveira MF, et al. [Seroprevalence of antibodies for toxoplasmosis, rubella,  
13  
14 369 cytomegalovirus, syphilis and HIV among pregnant women in Sergipe]. *Revista da Sociedade*  
15  
16 370 *Brasileira de Medicina Tropical* 2009;42(5):532-6. [published Online First: 2009/12/08]
- 17  
18 371 28. Artimos de Oliveira S, Bastos Camacho LA, Uzeda Barreto MC, et al. Serologic status of women in an  
19  
20 372 urban population in Brazil before and after rubella immunization campaign using routine screening  
21  
22 373 data. *The Journal of infectious diseases* 2011;204 Suppl 2:S664-8. doi: 10.1093/infdis/jir356  
23  
24 374 [published Online First: 2011/10/05]
- 25  
26 375 29. Avila Moura A, Mello MJG, Correia JB. Serological statuses of pregnant women in an urban Brazilian  
27  
28 376 population before and after the 2008 rubella immunization campaign. *Vaccine* 2016;34(4):445-50. doi:  
29  
30 377 10.1016/j.vaccine.2015.12.019 [published Online First: 2015/12/29]
- 31  
32 378 30. McElroy R, Laskin M, Jiang D, et al. Rates of rubella immunity among immigrant and non-immigrant  
33  
34 379 pregnant women. *Journal of obstetrics and gynaecology Canada : JOGC = Journal d'obstetrique et*  
35  
36 380 *gynecologie du Canada : JOGC* 2009;31(5):409-13. [published Online First: 2009/07/17]
- 37  
38 381 31. Lim GH, Harris T, Desai S, et al. Rubella immunity among prenatal women in Ontario, 2006-2010. *BMC*  
39  
40 382 *infectious diseases* 2013;13:362. doi: 10.1186/1471-2334-13-362 [published Online First: 2013/08/07]
- 41  
42 383 32. Lai FY, Dover DC, Lee B, et al. Determining rubella immunity in pregnant Alberta women 2009-2012.  
43  
44 384 *Vaccine* 2015;33(5):635-41. doi: 10.1016/j.vaccine.2014.12.022 [published Online First: 2014/12/24]
- 45  
46 385 33. Madi N, Al-Tawalrah H, Abdul Khalik D, et al. A relatively high number of pregnant women in Kuwait  
47  
48 386 remain susceptible to rubella: a need for an alternative vaccination policy. *Medical principles and*  
49  
50 387 *practice : international journal of the Kuwait University, Health Science Centre* 2014;23(2):145-8. doi:  
51  
52 388 10.1159/000356892 [published Online First: 2014/01/18]
- 53  
54 389 34. Belefquih B, Kasouati J, Doblali T, et al. Rubella seroprevalence in pregnant women at the military teaching  
55  
56 390 hospital, Rabat, Morocco. *International journal of gynaecology and obstetrics: the official organ of the*  
57  
58 391 *International Federation of Gynaecology and Obstetrics* 2013;120(2):191-2. doi:  
59  
60 392 10.1016/j.ijgo.2012.08.026 [published Online First: 2012/11/28]
- 393 35. Alsibiani SA. Rubella Immunity among Pregnant Women in Jeddah, Western Region of Saudi Arabia.



- 1  
2  
3  
4 394 *Obstetrics and gynecology international* 2014;2014:659838. doi: 10.1155/2014/659838 [published  
5  
6 395 Online First: 2014/07/22]  
7  
8 396 36. Byrne L, Brant L, Reynolds C, et al. Seroprevalence of low rubella IgG antibody levels among antenatal  
9  
10 397 women in England tested by NHS Blood and Transplant: 2004-2009. Is rubella susceptibility  
11  
12 398 increasing? *Vaccine* 2012;30(2):161-7. doi: 10.1016/j.vaccine.2011.11.045 [published Online First:  
13  
14 399 2011/11/29]  
15  
16 400 37. Enders M, Bartelt U, Knotek F, et al. Performance of the Elecsys Rubella IgG assay in the diagnostic  
17  
18 401 laboratory setting for assessment of immune status. *Clinical and vaccine immunology : CVI*  
19  
20 402 2013;20(3):420-6. doi: 10.1128/cvi.00688-12 [published Online First: 2013/01/25]  
21  
22 403 38. O'Dwyer V, Bonham S, Mulligan A, et al. Antenatal rubella immunity in Ireland. *Irish medical journal*  
23  
24 404 2013;106(8):232-5. [published Online First: 2013/11/29]  
25  
26 405 39. De Paschale M, Manco MT, Paganini A, et al. Rubella antibody screening during pregnancy in an urban area  
27  
28 406 of Northern Italy. *Infectious disease reports* 2012;4(1):e17. doi: 10.4081/idr.2012.e17 [published  
29  
30 407 Online First: 2012/01/02]  
31  
32 408 40. Vilajeliu A, Garcia-Basteiro AL, Valencia S, et al. Rubella susceptibility in pregnant women and results of a  
33  
34 409 postpartum immunization strategy in Catalonia, Spain. *Vaccine* 2015;33(15):1767-72. doi:  
35  
36 410 10.1016/j.vaccine.2015.02.043 [published Online First: 2015/03/04]  
37  
38 411 41. Kakoulidou M, Forsgren M, Lewensohn-Fuchs I, et al. Serum levels of rubella-specific antibodies in  
39  
40 412 Swedish women following three decades of vaccination programmes. *Vaccine* 2010;28(4):1002-7. doi:  
41  
42 413 10.1016/j.vaccine.2009.10.130 [published Online First: 2009/11/21]  
43  
44 414 42. Tamer GS, Dundar D, Caliskan E. Seroprevalence of *Toxoplasma gondii*, rubella and cytomegalovirus  
45  
46 415 among pregnant women in western region of Turkey. *Clinical and investigative medicine Medecine*  
47  
48 416 *clinique et experimentale* 2009;32(1):E43-7. [published Online First: 2009/01/31]  
49  
50 417 43. Uysal A, Taner CE, Cüce M, et al. Cytomegalovirus and rubella seroprevalence in pregnant women in  
51  
52 418 Izmir/Turkey: follow-up and results of pregnancy outcome. *Archives of Gynecology and Obstetrics*  
53  
54 419 2012;286(3):605-08. doi: 10.1007/s00404-012-2353-z  
55  
56 420 44. Matthews LA, Lawrance LM, Gray D, et al. An audit of rubella IgG antibody status in antenatal women in a  
57  
58 421 NHS Trust over 5 years (2005-2009). *Epidemiology and infection* 2011;139(11):1720-6. doi:  
59  
60 422 10.1017/s0950268810002748 [published Online First: 2010/12/09]  
423 423 45. Ogundele M, Ghebrehewet S, Chawla A. Some factors affecting rubella seronegative prevalence among

- 1  
2  
3  
4 424 pregnant women in a North West England region between April 2011 and March 2013. *Journal of*  
5  
6 425 *public health (Oxford, England)* 2016;38(2):243-9. doi: 10.1093/pubmed/fdv033 [published Online  
7  
8 426 First: 2015/03/20]
- 9  
10 427 46. Upreti SR, Thapa K, Pradhan YV, et al. Developing rubella vaccination policy in Nepal--results from rubella  
11  
12 428 surveillance and seroprevalence and congenital rubella syndrome studies. *The Journal of infectious*  
13  
14 429 *diseases* 2011;204 Suppl 1:S433-8. doi: 10.1093/infdis/jir078 [published Online First: 2011/06/17]
- 15  
16 430 47. Miyakawa M, Yoshino H, Yoshida LM, et al. Seroprevalence of rubella in the cord blood of pregnant  
17  
18 431 women and congenital rubella incidence in Nha Trang, Vietnam. *Vaccine* 2014;32(10):1192-8. doi:  
19  
20 432 10.1016/j.vaccine.2013.08.076 [published Online First: 2013/09/12]
- 21  
22 433 48. Nardone A, Tischer A, Andrews N, et al. Comparison of rubella seroepidemiology in 17 countries: progress  
23  
24 434 towards international disease control targets. *Bulletin of the World Health Organization*  
25  
26 435 2008;86(2):118-25. [published Online First: 2008/02/26]
- 27  
28 436 49. Okuda M, Yamanaka M, Takahashi T, et al. Positive rates for rubella antibody in pregnant women and  
29  
30 437 benefit of post-partum vaccination in a Japanese perinatal center. *The journal of obstetrics and*  
31  
32 438 *gynaecology research* 2008;34(2):168-73. doi: 10.1111/j.1447-0756.2007.00689.x [published Online  
33  
34 439 First: 2008/04/17]
- 35  
36 440 50. Hanaoka M, Hisano M, Watanabe N, et al. Changes in the prevalence of the measles, rubella, varicella-  
37  
38 441 zoster, and mumps virus antibody titers in Japanese pregnant women. *Vaccine* 2013;31(19):2343-7.  
39  
40 442 doi: 10.1016/j.vaccine.2013.03.012 [published Online First: 2013/03/26]
- 41  
42 443 51. Yamada T, Mochizuki J, Hanaoka M, et al. Effects of campaign for postpartum vaccination on seronegative  
43  
44 444 rate against rubella among Japanese women. *BMC infectious diseases* 2014;14:152. doi: 10.1186/1471-  
45  
46 445 2334-14-152 [published Online First: 2014/03/22]
- 47  
48 446 52. Liu F, Zhang S, Liu J, et al. Sociodemographic and economic characteristics of susceptibility to rubella  
49  
50 447 among women preparing for pregnancy in rural China. *International journal of infectious diseases :*  
51  
52 448 *IJID : official publication of the International Society for Infectious Diseases* 2017;62:112-18. doi:  
53  
54 449 10.1016/j.ijid.2017.07.013 [published Online First: 2017/07/26]
- 55  
56 450 53. Lin CC, Yang CY, Shih YL, et al. Rubella seroepidemiology and estimations of the catch-up immunisation  
57  
58 451 rate and persistence of antibody titers in pregnant women in Taiwan. *BJOG : an international journal*  
59  
60 452 *of obstetrics and gynaecology* 2011;118(6):706-12. doi: 10.1111/j.1471-0528.2011.02903.x [published  
453  
Online First: 2011/03/10]

1  
2  
3  
4  
5  
6  
7  
8  
9  
10  
11  
12  
13  
14  
15  
16  
17  
18  
19  
20  
21  
22  
23  
24  
25  
26  
27  
28  
29  
30  
31  
32  
33  
34  
35  
36  
37  
38  
39  
40  
41  
42  
43  
44  
45  
46  
47  
48  
49  
50  
51  
52  
53  
54  
55  
56  
57  
58  
59  
60

454 54. Lin CC, Yang CY, Shih YL, et al. Persistence and titer changes of rubella virus antibodies in primiparous  
455 women who had been vaccinated with strain RA 27/3 in junior high school. *Clinical and vaccine*  
456 *immunology : CVI* 2012;19(1):1-4. doi: 10.1128/cvi.05334-11 [published Online First: 2011/11/11]

For peer review only

458 **Table 1** Test results for anti-rubella IgG by each tested-year and age for 328,465 Korean women tested for rubella IgG antibodies.

| Test year | 15-20 years |       |       |       | 21-30 years |        |        |         | 31-40 years |        |         |         | 41-49 years |       |       |       |
|-----------|-------------|-------|-------|-------|-------------|--------|--------|---------|-------------|--------|---------|---------|-------------|-------|-------|-------|
|           | N           | E     | P     | Total | N           | E      | P      | Total   | N           | E      | P       | Total   | N           | E     | P     | Total |
| 2010      | 8           | 48    | 312   | 368   | 1,332       | 2,499  | 13,628 | 17,459  | 1,640       | 1,601  | 16,691  | 19,932  | 87          | 102   | 623   | 812   |
|           | 2.2%        | 13.0% | 84.8% | 9.4%  | 7.6%        | 14.3%  | 78.1%  | 14.1%   | 8.2%        | 8.0%   | 83.7%   | 10.4%   | 10.7%       | 12.6% | 76.7% | 8.6%  |
| 2011      | 25          | 64    | 451   | 540   | 1,717       | 3,024  | 13,376 | 18,117  | 2,167       | 2,600  | 17,668  | 22,436  | 120         | 103   | 687   | 910   |
|           | 4.6%        | 11.9% | 83.5% | 13.8% | 9.5%        | 16.7%  | 73.8%  | 14.6%   | 9.7%        | 11.6%  | 78.8%   | 11.8%   | 13.2%       | 11.3% | 75.5% | 9.6%  |
| 2012      | 30          | 105   | 439   | 574   | 1,381       | 2,899  | 13,388 | 17,668  | 2,321       | 3,438  | 19,407  | 25,166  | 225         | 137   | 1,125 | 1,487 |
|           | 5.2%        | 18.3% | 76.5% | 14.7% | 7.8%        | 16.4%  | 75.8%  | 14.2%   | 9.2%        | 13.7%  | 77.1%   | 13.2%   | 15.1%       | 9.2%  | 75.7% | 15.8% |
| 2013      | 23          | 113   | 379   | 515   | 1,195       | 2,491  | 11,989 | 15,675  | 2,477       | 3,867  | 18,106  | 24,450  | 135         | 106   | 875   | 1,116 |
|           | 4.5%        | 21.9% | 73.6% | 13.2% | 7.6%        | 15.9%  | 76.5%  | 12.6%   | 10.1%       | 15.8%  | 74.1%   | 12.8%   | 12.1%       | 9.5%  | 78.4% | 11.8% |
| 2014      | 35          | 100   | 405   | 540   | 778         | 2,032  | 11,793 | 14,603  | 2,142       | 3,662  | 17,906  | 23,710  | 111         | 108   | 919   | 1,138 |
|           | 6.5%        | 18.5% | 75.0% | 13.8% | 5.3%        | 13.9%  | 80.8%  | 11.8%   | 9.0%        | 15.4%  | 75.5%   | 12.4%   | 9.8%        | 9.5%  | 80.8% | 12.1% |
| 2015      | 29          | 84    | 398   | 511   | 674         | 2,032  | 11,596 | 14,302  | 2,407       | 4,361  | 18,467  | 25,235  | 137         | 91    | 997   | 1,225 |
|           | 5.7%        | 16.4% | 77.9% | 13.1% | 4.7%        | 14.2%  | 81.1%  | 11.5%   | 9.5%        | 17.3%  | 73.2%   | 13.2%   | 11.2%       | 7.4%  | 81.4% | 13.0% |
| 2016      | 39          | 79    | 389   | 507   | 651         | 1,887  | 11,152 | 13,690  | 2,573       | 4,532  | 18,304  | 25,409  | 142         | 105   | 1,029 | 1,276 |
|           | 7.7%        | 15.6% | 76.7% | 13.0% | 4.8%        | 13.8%  | 81.5%  | 11.0%   | 10.1%       | 17.8%  | 72.0%   | 13.3%   | 11.1%       | 8.2%  | 80.6% | 13.5% |
| 2017      | 39          | 78    | 228   | 345   | 779         | 1,985  | 9,922  | 12,686  | 2,689       | 4,709  | 17,151  | 24,549  | 162         | 118   | 1,196 | 1,476 |
|           | 11.3%       | 22.6% | 66.1% | 8.8%  | 6.1%        | 15.6%  | 78.2%  | 10.2%   | 11.0%       | 19.2%  | 69.9%   | 12.9%   | 11.0%       | 8.0%  | 81.0% | 15.6% |
| Total     | 228         | 671   | 3,001 | 3,900 | 8,507       | 18,849 | 96,844 | 124,200 | 18,416      | 28,770 | 143,700 | 190,886 | 1,119       | 870   | 7,451 | 9,440 |
|           | 5.8%        | 17.2% | 76.9% |       | 6.8%        | 15.2%  | 78.0%  |         | 9.6%        | 15.1%  | 75.3%   |         | 11.9%       | 9.2%  | 78.9% |       |

459 Abbreviations: E, equivocal; N, negative; P, positive

460

461 **Table 2** Association between seroprevalence of anti-rubella IgG (being immune to rubella)\* and population characteristics

|                          | Total   | Immune  |      | Univariable logistic regression |           |         | Multivariable logistic regression |           |         |
|--------------------------|---------|---------|------|---------------------------------|-----------|---------|-----------------------------------|-----------|---------|
|                          | n       | n       | %    | Odds ratio                      | 95% CI    | P-value | Odds ratio                        | 95% CI    | P-value |
| Tested year              |         |         |      |                                 |           |         |                                   |           |         |
| 2010                     | 38,571  | 35,504  | 92.0 |                                 |           |         |                                   |           |         |
| 2011                     | 42,002  | 37,973  | 90.4 | 0.81                            | 0.78-0.86 | <0.0001 | 0.79                              | 0.75-0.83 | <0.0001 |
| 2012                     | 44,895  | 40,938  | 91.2 | 0.89                            | 0.85-0.94 | <0.0001 | 0.85                              | 0.81-0.89 | <0.0001 |
| 2013                     | 41,756  | 37,926  | 90.8 | 0.86                            | 0.81-0.90 | <0.0001 | 0.78                              | 0.74-0.82 | <0.0001 |
| 2014                     | 39,991  | 36,925  | 92.3 | 1.04                            | 0.99-1.10 | 0.1368  | 0.91                              | 0.86-0.96 | 0.0003  |
| 2015                     | 41,273  | 38,026  | 92.1 | 1.01                            | 0.96-1.07 | 0.6586  | 0.84                              | 0.80-0.89 | <0.0001 |
| 2016                     | 40,882  | 37,477  | 91.7 | 0.95                            | 0.90-1.00 | 0.0520  | 0.75                              | 0.72-0.79 | <0.0001 |
| 2017                     | 39,056  | 35,387  | 90.6 | 0.83                            | 0.79-0.88 | <0.0001 | 0.63                              | 0.60-0.67 | <0.0001 |
| Age of women             |         |         |      |                                 |           |         |                                   |           |         |
| 15-20 years              | 3,900   | 3,672   | 94.2 |                                 |           |         |                                   |           |         |
| 21-30 years              | 124,200 | 115,693 | 93.2 | 0.84                            | 0.74-0.97 | <0.0001 |                                   |           |         |
| 31-40 years              | 190,886 | 172,470 | 90.4 | 0.58                            | 0.51-0.67 | <0.0001 |                                   |           |         |
| 41-49 years              | 9,440   | 8,321   | 88.1 | 0.46                            | 0.40-0.54 | <0.0001 | 0.85                              | 0.79-0.90 | <0.0001 |
| Cohort                   |         |         |      |                                 |           |         |                                   |           |         |
| Pre-catch up (1976-1984) | 228,176 | 205,536 | 90.1 |                                 |           |         |                                   |           |         |
| Catch-up (1985-1993)     | 94,056  | 88,887  | 94.5 | 1.89                            | 1.84-1.95 | <0.0001 | 1.99                              | 1.92-2.05 | <0.0001 |
| Keep-up (≥1994)          | 6,194   | 5,733   | 92.6 | 1.37                            | 1.24-1.51 | <0.0001 | 1.50                              | 1.36-1.65 | <0.0001 |
| Geographic locations     |         |         |      |                                 |           |         |                                   |           |         |
| Seoul                    | 65,380  | 59,821  | 91.5 |                                 |           |         |                                   |           |         |
| Gyeonggi Province        | 131,157 | 120,183 | 91.6 | 1.02                            | 0.98-1.05 | 0.3078  |                                   |           |         |
| Incheon                  | 9,611   | 8,747   | 91.0 | 0.94                            | 0.87-1.01 | 0.1111  | 0.93                              | 0.86-1.00 | 0.0382  |
| Gangwon Province         | 703     | 654     | 93.0 | 1.24                            | 0.93-1.66 | 0.1478  |                                   |           |         |

|    |                            |        |        |      |      |           |         |      |           |         |
|----|----------------------------|--------|--------|------|------|-----------|---------|------|-----------|---------|
| 1  |                            |        |        |      |      |           |         |      |           |         |
| 2  |                            |        |        |      |      |           |         |      |           |         |
| 3  | Sejong City                | 3,859  | 3,623  | 93.9 | 1.43 | 1.25-1.63 | <0.0001 | 1.20 | 1.05-1.37 | 0.0076  |
| 4  | Daejeon                    | 12,496 | 11,553 | 92.5 | 1.14 | 1.06-1.22 | 0.0004  | 1.07 | 1.00-1.15 | 0.0484  |
| 5  | North Chungcheong Province | 11,186 | 10,306 | 92.1 | 1.09 | 1.01-1.17 | 0.0252  |      |           |         |
| 6  | South Chungcheong Province | 8,390  | 7,710  | 91.9 | 1.05 | 0.97-1.14 | 0.2178  |      |           |         |
| 7  | Daegu                      | 14,781 | 13,473 | 91.2 | 0.96 | 0.90-1.02 | 0.1739  |      |           |         |
| 8  | Ulsan                      | 660    | 625    | 94.7 | 1.66 | 1.18-2.34 | 0.0037  |      |           |         |
| 9  | North Gyeongsang Province  | 2,075  | 1,891  | 91.1 | 0.96 | 0.82-1.11 | 0.5577  |      |           |         |
| 10 | South Gyeongsang Province  | 4,426  | 3,994  | 90.2 | 0.86 | 0.78-0.95 | 0.0039  | 0.85 | 0.77-0.95 | 0.0023  |
| 11 | Busan                      | 12,574 | 11,376 | 90.5 | 0.88 | 0.83-0.94 | 0.0002  | 0.86 | 0.81-0.91 | <0.0001 |
| 12 | Gwangju                    | 2,035  | 1,845  | 90.7 | 0.90 | 0.78-1.05 | 0.1848  |      |           |         |
| 13 | North Jeolla Province      | 11,911 | 10,890 | 91.4 | 0.99 | 0.92-1.06 | 0.8031  | 0.93 | 0.87-0.99 | 0.0213  |
| 14 | South Jeolla Province      | 13,621 | 12,233 | 89.8 | 0.82 | 0.77-0.87 | <0.0001 | 0.79 | 0.75-0.84 | <0.0001 |
| 15 | Jeju Province              | 23,561 | 21,232 | 90.1 | 0.85 | 0.81-0.89 | <0.0001 | 0.83 | 0.79-0.87 | <0.0001 |

462 \*Positive and equivocal results of anti-rubella specific IgG test results were defined as 'immune' in this study.<sup>18</sup>

463 **Table 3** Previous studies on rubella seronegativity in women that included more than 1,000 subjects and were published within the past 10 years, grouped by World Health  
 464 Organization region.

| WHO region | Publication year | N       | Country           | Seronegativity (%) | Population | Reference                                | Measurement method                                                           |
|------------|------------------|---------|-------------------|--------------------|------------|------------------------------------------|------------------------------------------------------------------------------|
| AFR        | 2009             | 7,430   | South Africa      | 6.2                | WCBA       | Schoub et al. <sup>26</sup>              | Bio-Rad Platelia Rubella IgG ELISA                                           |
| AMR        | 2009             | 8,939   | Brazil            | 28.4               | Pregnant   | Inagaki et al. <sup>27</sup>             | Q-Preven IgG-DBS kit                                                         |
| AMR        | 2011             | 9,610   | Brazil            | 11.6               | Pregnant   | Artimos de Oliveira et al. <sup>28</sup> | Beckman Coulter Access RUBELLA IgG ChLIA or bioMérieux VIDAS RUB IgG II ELFA |
| AMR        | 2016             | 54,717  | Brazil            | 4.5                | Pregnant   | Avila Moura et al. <sup>29</sup>         | Q-Preven IgG-DBS kit                                                         |
| AMR        | 2009             | 5,783   | Canada            | 7.0                | Pregnant   | McElroy et al. <sup>30</sup>             | Hemagglutination inhibition test                                             |
| AMR        | 2013             | 459,963 | Canada            | 4.4                | WCBA       | Lim et al. <sup>31</sup>                 | Abbott AxSYM Rubella IgG MEIA                                                |
| AMR        | 2015             | 157,763 | Canada            | 15.9               | Pregnant   | Lai et al. <sup>32</sup>                 | Abbott ARCHITECT Rubella IgG CMIA                                            |
| EMR        | 2014             | 4,062   | Kuwait            | 6.8                | Pregnant   | Madi et al. <sup>33</sup>                | Abbott ARCHITECT Rubella IgG CMIA                                            |
| EMR        | 2013             | 2,284   | Morocco           | 9.8                | Pregnant   | Belefqih et al. <sup>34</sup>            | Siemens Enzygnost Anti-Rubella-Virus IgG EIA                                 |
| EMR        | 2014             | 10,276  | Saudi Arabia      | 8.7                | Pregnant   | Sharifa et al. <sup>35</sup>             | Dade Behring ELISA BP III                                                    |
| EUR        | 2012             | 424,876 | England           | 2.6                | Pregnant   | Byrne et al. <sup>36</sup>               | Microgen Mercia Rubella G EIA                                                |
| EUR        | 2013             | 1,090   | Germany           | 1.6                | Pregnant   | Enders et al. <sup>37</sup>              | Hemagglutination inhibition test                                             |
| EUR        | 2013             | 74,810  | Ireland           | 6.2                | Pregnant   | O'Dwyer et al. <sup>38</sup>             | Method not described                                                         |
| EUR        | 2012             | 2,385   | Italy             | 8.0                | Pregnant   | De Paschale et al. <sup>39</sup>         | DiaSorin ETI-RUBEK-G PLUS EIA                                                |
| EUR        | 2015             | 22,681  | Spain             | 5.9                | Pregnant   | Vilajeliu et al. <sup>40</sup>           | Siemens ADVIA Centaur Rubella G ChLIA                                        |
| EUR        | 2010             | 41,637  | Sweden            | 4.2                | Pregnant   | Kakoulidou et al. <sup>41</sup>          | Abbott AxSYM Rubella IgG MEIA                                                |
| EUR        | 2009             | 1,972   | Turkey            | 3.9                | Pregnant   | Tamer et al. <sup>42</sup>               | Abbott AxSYM Rubella IgG MEIA                                                |
| EUR        | 2012             | 5,959   | Turkey            | 1.9                | Pregnant   | Uysal et al. <sup>43</sup>               | bioMérieux VIDAS RUB IgG II ELFA                                             |
| EUR        | 2011             | 11,987  | UK                | 4.4                | Pregnant   | Matthews et al. <sup>44</sup>            | DiaSorin ETI-RUBEK-G EIA                                                     |
| EUR        | 2016             | 19,046  | UK                | 6.3                | Pregnant   | Ogundele et al. <sup>45</sup>            | Roche E602 MODULAR analyzer                                                  |
| SEAR       | 2011             | 2,224   | Nepal             | 9.2                | WCBA       | Upreti et al. <sup>46</sup>              | Enzygnost Anti-Rubella-Virus IgG EIA                                         |
| SEAR       | 2014             | 1,988   | Vietnam           | 28.9               | Pregnant   | Miyakawa et al. <sup>47</sup>            | bioMérieux Mini VIDAS EIA                                                    |
| WPR        | 2008             | 1,020   | Australia         | 2.7                | WCBA       | Nardone et al. <sup>48</sup>             | Siemens Enzygnost Anti-Rubella-Virus IgG EIA                                 |
| WPR        | 2008             | 2,741   | Japan             | 6.7                | Pregnant   | Okuda et al. <sup>49</sup>               | Hemagglutination inhibition test                                             |
| WPR        | 2013             | 13,924  | Japan             | 2.7                | Pregnant   | Hanaoka et al. <sup>50</sup>             | Hemagglutination inhibition test                                             |
| WPR        | 2014             | 20,363  | Japan             | 4.7                | Pregnant   | Yamada et al. <sup>51</sup>              | Hemagglutination inhibition test                                             |
| WPR        | 2017             | 782,293 | China             | 33.8               | WCBA       | Liu et al. <sup>52</sup>                 | Method not described                                                         |
| WPR        | 2011             | 43,640  | Taiwan            | 10.9               | Pregnant   | Lin et al. <sup>53</sup>                 | Abbott AxSYM Rubella IgG MEIA and Beckman Coulter Access RUBELLA IgG ChLIA   |
| WPR        | 2012             | 14,090  | Taiwan            | 6.5                | Pregnant   | Lin et al. <sup>54</sup>                 | Abbott AxSYM Rubella IgG MEIA                                                |
| WPR        | 2019             | 327,637 | Republic of Korea | 8.7                | WCBA       | This study                               | Abbott ARCHITECT Rubella IgG CMIA                                            |

1  
2  
3 465 Abbreviations: AFR, Africa Region; AMR, American Region; EMR, Middle East Region; EUR, European Region; SEAR, East Asian Region; WCBA, Women of  
4  
5 466 childbearing age; WHO, World Health Organization; WPR, Western Pacific Region.  
6  
7  
8  
9  
10  
11  
12  
13  
14  
15  
16  
17  
18  
19  
20  
21  
22  
23  
24  
25  
26  
27  
28  
29  
30  
31  
32  
33  
34  
35  
36  
37  
38  
39  
40  
41  
42  
43  
44  
45  
46

For peer review only



1  
2  
3  
4 467 **Figure Legends**

5  
6 468

7  
8 469 **Figure 1** Rubella-specific IgG antibody test results with annual incidence of rubella infection and congenital  
9  
10 470 rubella syndrome from surveillance data by year (2010 – 2017). Percentage of rubella specific IgG results in this  
11  
12 471 study (left axis) and numbers of cases for incidence of rubella from surveillance data (right axis) are plotted  
13  
14 472 against years tested.

15  
16 473  
17  
18  
19  
20  
21  
22  
23  
24  
25  
26  
27  
28  
29  
30  
31  
32  
33  
34  
35  
36  
37  
38  
39  
40  
41  
42  
43  
44  
45  
46  
47  
48  
49  
50  
51  
52  
53  
54  
55  
56  
57  
58  
59  
60

For peer review only

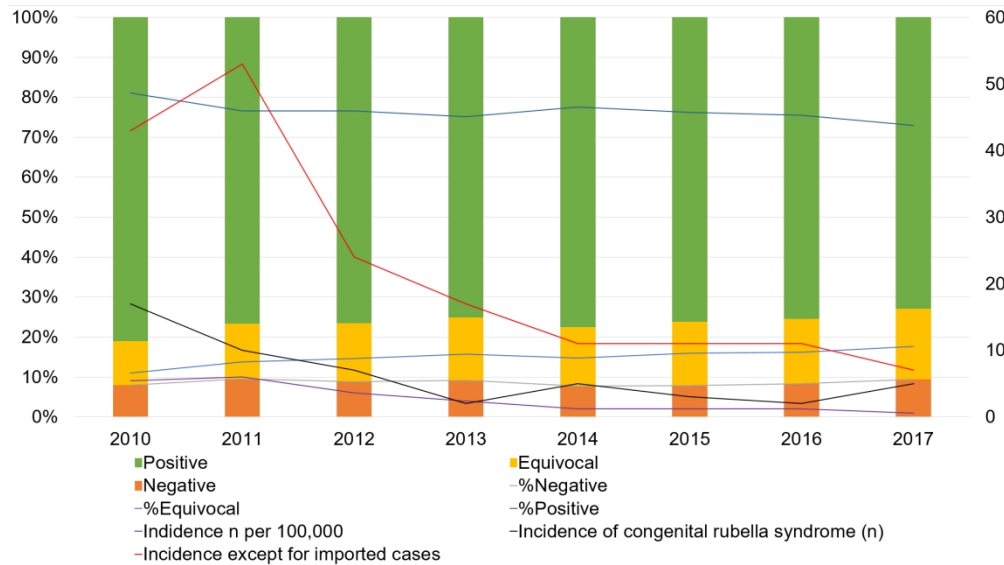

Figure 1 Rubella-specific IgG antibody test results with annual incidence of rubella infection and congenital rubella syndrome from surveillance data by year (2010 – 2017). Percentage of rubella specific IgG results in this study (left axis) and numbers of cases for incidence of rubella from surveillance data (right axis) are plotted against years tested.

**STROBE 2007 (v4) Statement—Checklist of items that should be included in reports of *cross-sectional studies***

| Section/Topic                | Item # | Recommendation                                                                                                                                                                       | Reported on page # |
|------------------------------|--------|--------------------------------------------------------------------------------------------------------------------------------------------------------------------------------------|--------------------|
| <b>Title and abstract</b>    | 1      | (a) Indicate the study’s design with a commonly used term in the title or the abstract                                                                                               | 1-2                |
|                              |        | (b) Provide in the abstract an informative and balanced summary of what was done and what was found                                                                                  | 2                  |
| <b>Introduction</b>          |        |                                                                                                                                                                                      |                    |
| Background/rationale         | 2      | Explain the scientific background and rationale for the investigation being reported                                                                                                 | 4-5                |
| Objectives                   | 3      | State specific objectives, including any prespecified hypotheses                                                                                                                     | 4-5                |
| <b>Methods</b>               |        |                                                                                                                                                                                      |                    |
| Study design                 | 4      | Present key elements of study design early in the paper                                                                                                                              | 5-7                |
| Setting                      | 5      | Describe the setting, locations, and relevant dates, including periods of recruitment, exposure, follow-up, and data collection                                                      | 5-7                |
| Participants                 | 6      | (a) Give the eligibility criteria, and the sources and methods of selection of participants                                                                                          | 5-7                |
| Variables                    | 7      | Clearly define all outcomes, exposures, predictors, potential confounders, and effect modifiers. Give diagnostic criteria, if applicable                                             | 7                  |
| Data sources/<br>measurement | 8*     | For each variable of interest, give sources of data and details of methods of assessment (measurement). Describe comparability of assessment methods if there is more than one group | 6-7                |
| Bias                         | 9      | Describe any efforts to address potential sources of bias                                                                                                                            | 6-7                |
| Study size                   | 10     | Explain how the study size was arrived at                                                                                                                                            | 6-7                |
| Quantitative variables       | 11     | Explain how quantitative variables were handled in the analyses. If applicable, describe which groupings were chosen and why                                                         | 6-7                |
| Statistical methods          | 12     | (a) Describe all statistical methods, including those used to control for confounding                                                                                                | 6-7                |
|                              |        | (b) Describe any methods used to examine subgroups and interactions                                                                                                                  | 6-7                |
|                              |        | (c) Explain how missing data were addressed                                                                                                                                          | 6                  |
|                              |        | (d) If applicable, describe analytical methods taking account of sampling strategy                                                                                                   | 6-7                |
|                              |        | (e) Describe any sensitivity analyses                                                                                                                                                | Not applicable     |
| <b>Results</b>               |        |                                                                                                                                                                                      |                    |

|                          |     |                                                                                                                                                                                                              |                |
|--------------------------|-----|--------------------------------------------------------------------------------------------------------------------------------------------------------------------------------------------------------------|----------------|
| Participants             | 13* | (a) Report numbers of individuals at each stage of study—eg numbers potentially eligible, examined for eligibility, confirmed eligible, included in the study, completing follow-up, and analysed            | 6-7            |
|                          |     | (b) Give reasons for non-participation at each stage                                                                                                                                                         | Not applicable |
|                          |     | (c) Consider use of a flow diagram                                                                                                                                                                           | Not applicable |
| Descriptive data         | 14* | (a) Give characteristics of study participants (eg demographic, clinical, social) and information on exposures and potential confounders                                                                     | 6-7            |
|                          |     | (b) Indicate number of participants with missing data for each variable of interest                                                                                                                          | 6-7            |
| Outcome data             | 15* | Report numbers of outcome events or summary measures                                                                                                                                                         | 8              |
| Main results             | 16  | (a) Give unadjusted estimates and, if applicable, confounder-adjusted estimates and their precision (eg, 95% confidence interval). Make clear which confounders were adjusted for and why they were included | 8              |
|                          |     | (b) Report category boundaries when continuous variables were categorized                                                                                                                                    | 7-8            |
|                          |     | (c) If relevant, consider translating estimates of relative risk into absolute risk for a meaningful time period                                                                                             | 7-8            |
| Other analyses           | 17  | Report other analyses done—eg analyses of subgroups and interactions, and sensitivity analyses                                                                                                               | 7-8            |
| <b>Discussion</b>        |     |                                                                                                                                                                                                              |                |
| Key results              | 18  | Summarise key results with reference to study objectives                                                                                                                                                     | 9              |
| Limitations              | 19  | Discuss limitations of the study, taking into account sources of potential bias or imprecision. Discuss both direction and magnitude of any potential bias                                                   | 9-11           |
| Interpretation           | 20  | Give a cautious overall interpretation of results considering objectives, limitations, multiplicity of analyses, results from similar studies, and other relevant evidence                                   | 9-11           |
| Generalisability         | 21  | Discuss the generalisability (external validity) of the study results                                                                                                                                        | 11             |
| <b>Other information</b> |     |                                                                                                                                                                                                              |                |
| Funding                  | 22  | Give the source of funding and the role of the funders for the present study and, if applicable, for the original study on which the present article is based                                                | 3              |

\*Give information separately for cases and controls in case-control studies and, if applicable, for exposed and unexposed groups in cohort and cross-sectional studies.

**Note:** An Explanation and Elaboration article discusses each checklist item and gives methodological background and published examples of transparent reporting. The STROBE checklist is best used in conjunction with this article (freely available on the Web sites of PLoS Medicine at <http://www.plosmedicine.org/>, Annals of Internal Medicine at <http://www.annals.org/>, and Epidemiology at <http://www.epidem.com/>). Information on the STROBE Initiative is available at [www.strobe-statement.org](http://www.strobe-statement.org).
